# Supplementary material for: Modeling changes in US monetary policy with a time-varying nonlinear Taylor rule
Source: publisher site journal article supplement (doi:10.1515/snde-2017-0092), 2018-04-03
Supplement: Supplementary file 1 [file Data_Monthly_Garch.xls]

## Sheet: Data
Year	Inflation	Inf(-1)	Inf(-2)	Inf(-3)	Inf(-4)	Inf(-5)	Inf(-6)	Ugap-5	u5gap(-1)	u5gap(-2)	u5gap(-3)
1952:12	0.906687	1.40578	2.02599	2.30503	3.20959	2.97183	2.31392	1.56333	NaN	NaN	NaN
1953:01	0.718336	0.906687	1.40578	2.02599	2.30503	3.20959	2.97183	1.355	1.56333	NaN	NaN
1953:02	0.68156	0.718336	0.906687	1.40578	2.02599	2.30503	3.20959	1.635	1.355	1.56333	NaN
1953:03	0.909435	0.68156	0.718336	0.906687	1.40578	2.02599	2.30503	1.61167	1.635	1.355	1.56333
1953:04	0.869237	0.909435	0.68156	0.718336	0.906687	1.40578	2.02599	1.49167	1.61167	1.635	1.355
1953:05	0.868908	0.869237	0.909435	0.68156	0.718336	0.906687	1.40578	1.675	1.49167	1.61167	1.635
1953:06	0.904636	0.868908	0.869237	0.909435	0.68156	0.718336	0.906687	1.65667	1.675	1.49167	1.61167
1953:07	0.412294	0.904636	0.868908	0.869237	0.909435	0.68156	0.718336	1.54	1.65667	1.675	1.49167
1953:08	0.599475	0.412294	0.904636	0.868908	0.869237	0.909435	0.68156	1.42	1.54	1.65667	1.675
1953:09	0.976342	0.599475	0.412294	0.904636	0.868908	0.869237	0.909435	1.205	1.42	1.54	1.65667
1953:10	0.974148	0.976342	0.599475	0.412294	0.904636	0.868908	0.869237	0.995	1.205	1.42	1.54
1953:11	0.599475	0.974148	0.976342	0.599475	0.412294	0.904636	0.868908	0.59	0.995	1.205	1.42
1953:12	0.599027	0.599475	0.974148	0.976342	0.599475	0.412294	0.904636	-0.401667	0.59	0.995	1.205
1954:01	1.12613	0.599027	0.599475	0.974148	0.976342	0.599475	0.412294	-0.791667	-0.401667	0.59	0.995
1954:02	1.50432	1.12613	0.599027	0.599475	0.974148	0.976342	0.599475	-1.08333	-0.791667	-0.401667	0.59
1954:03	1.12655	1.50432	1.12613	0.599027	0.599475	0.974148	0.976342	-1.57167	-1.08333	-0.791667	-0.401667
1954:04	0.636943	1.12655	1.50432	1.12613	0.599027	0.599475	0.974148	-1.76167	-1.57167	-1.08333	-0.791667
1954:05	0.861423	0.636943	1.12655	1.50432	1.12613	0.599027	0.599475	-1.765	-1.76167	-1.57167	-1.08333
1954:06	0.635039	0.861423	0.636943	1.12655	1.50432	1.12613	0.599027	-1.475	-1.765	-1.76167	-1.57167
1954:07	0.261292	0.635039	0.861423	0.636943	1.12655	1.50432	1.12613	-1.69	-1.475	-1.765	-1.76167
1954:08	0	0.261292	0.635039	0.861423	0.636943	1.12655	1.50432	-1.90333	-1.69	-1.475	-1.765
1954:09	-0.297508	0	0.261292	0.635039	0.861423	0.636943	1.12655	-2.01167	-1.90333	-1.69	-1.475
1954:10	-0.853432	-0.297508	0	0.261292	0.635039	0.861423	0.636943	-1.64833	-2.01167	-1.90333	-1.69
1954:11	-0.260708	-0.853432	-0.297508	0	0.261292	0.635039	0.861423	-1.26667	-1.64833	-2.01167	-1.90333
1954:12	-0.372162	-0.260708	-0.853432	-0.297508	0	0.261292	0.635039	-0.993333	-1.26667	-1.64833	-2.01167
1955:01	-0.631032	-0.372162	-0.260708	-0.853432	-0.297508	0	0.261292	-0.92	-0.993333	-1.26667	-1.64833
1955:02	-0.629863	-0.631032	-0.372162	-0.260708	-0.853432	-0.297508	0	-0.748333	-0.92	-0.993333	-1.26667
1955:03	-0.519866	-0.629863	-0.631032	-0.372162	-0.260708	-0.853432	-0.297508	-0.676667	-0.748333	-0.92	-0.993333
1955:04	-0.260611	-0.519866	-0.629863	-0.631032	-0.372162	-0.260708	-0.853432	-0.795	-0.676667	-0.748333	-0.92
1955:05	-0.594133	-0.260611	-0.519866	-0.629863	-0.631032	-0.372162	-0.260708	-0.415	-0.795	-0.676667	-0.748333
1955:06	-0.853749	-0.594133	-0.260611	-0.519866	-0.629863	-0.631032	-0.372162	-0.335	-0.415	-0.795	-0.676667
1955:07	-0.372301	-0.853749	-0.594133	-0.260611	-0.519866	-0.629863	-0.631032	-0.151667	-0.335	-0.415	-0.795
1955:08	-0.484171	-0.372301	-0.853749	-0.594133	-0.260611	-0.519866	-0.629863	-0.356667	-0.151667	-0.335	-0.415
1955:09	0.149198	-0.484171	-0.372301	-0.853749	-0.594133	-0.260611	-0.519866	-0.261667	-0.356667	-0.151667	-0.335
1955:10	0.374251	0.149198	-0.484171	-0.372301	-0.853749	-0.594133	-0.260611	-0.46	-0.261667	-0.356667	-0.151667
1955:11	0.373413	0.374251	0.149198	-0.484171	-0.372301	-0.853749	-0.594133	-0.36	-0.46	-0.261667	-0.356667
1955:12	0.373552	0.373413	0.374251	0.149198	-0.484171	-0.372301	-0.853749	-0.361667	-0.36	-0.46	-0.261667
1956:01	0.224131	0.373552	0.373413	0.374251	0.149198	-0.484171	-0.372301	-0.156667	-0.361667	-0.36	-0.46
1956:02	0.149142	0.224131	0.373552	0.373413	0.374251	0.149198	-0.484171	-0.0483333	-0.156667	-0.361667	-0.36
1956:03	0.373274	0.149142	0.224131	0.373552	0.373413	0.374251	0.149198	-0.335	-0.0483333	-0.156667	-0.361667
1956:04	0.522583	0.373274	0.149142	0.224131	0.373552	0.373413	0.374251	-0.12	-0.335	-0.0483333	-0.156667
1956:05	0.971236	0.522583	0.373274	0.149142	0.224131	0.373552	0.373413	-0.398333	-0.12	-0.335	-0.0483333
1956:06	1.64732	0.971236	0.522583	0.373274	0.149142	0.224131	0.373552	-0.38	-0.398333	-0.12	-0.335
1956:07	1.98057	1.64732	0.971236	0.522583	0.373274	0.149142	0.224131	-0.458333	-0.38	-0.398333	-0.12
1956:08	2.20808	1.98057	1.64732	0.971236	0.522583	0.373274	0.149142	-0.141667	-0.458333	-0.38	-0.398333
1956:09	1.8622	2.20808	1.98057	1.64732	0.971236	0.522583	0.373274	0.0683333	-0.141667	-0.458333	-0.38
1956:10	2.57271	1.8622	2.20808	1.98057	1.64732	0.971236	0.522583	0.075	0.0683333	-0.141667	-0.458333
1956:11	2.34375	2.57271	1.8622	2.20808	1.98057	1.64732	0.971236	-0.311667	0.075	0.0683333	-0.141667
1956:12	2.82843	2.34375	2.57271	1.8622	2.20808	1.98057	1.64732	-0.193333	-0.311667	0.075	0.0683333
1957:01	3.13082	2.82843	2.34375	2.57271	1.8622	2.20808	1.98057	-0.176667	-0.193333	-0.311667	0.075
1957:02	3.49963	3.13082	2.82843	2.34375	2.57271	1.8622	2.20808	0.136667	-0.176667	-0.193333	-0.311667
1957:03	3.60729	3.49963	3.13082	2.82843	2.34375	2.57271	1.8622	0.35	0.136667	-0.176667	-0.193333
1957:04	3.71333	3.60729	3.49963	3.13082	2.82843	2.34375	2.57271	0.166667	0.35	0.136667	-0.176667
1957:05	3.58861	3.71333	3.60729	3.49963	3.13082	2.82843	2.34375	-0.015	0.166667	0.35	0.136667
1957:06	3.53591	3.58861	3.71333	3.60729	3.49963	3.13082	2.82843	-0.193333	-0.015	0.166667	0.35
1957:07	3.29791	3.53591	3.58861	3.71333	3.60729	3.49963	3.13082	-0.0766667	-0.193333	-0.015	0.166667
1957:08	3.55181	3.29791	3.53591	3.58861	3.71333	3.60729	3.49963	0.035	-0.0766667	-0.193333	-0.015
1957:09	3.54662	3.55181	3.29791	3.53591	3.58861	3.71333	3.60729	-0.243333	0.035	-0.0766667	-0.193333
1957:10	2.94438	3.54662	3.55181	3.29791	3.53591	3.58861	3.71333	-0.318333	-0.243333	0.035	-0.0766667
1957:11	3.27154	2.94438	3.54662	3.55181	3.29791	3.53591	3.58861	-0.88	-0.318333	-0.243333	0.035
1957:12	3.04017	3.27154	2.94438	3.54662	3.55181	3.29791	3.53591	-0.938333	-0.88	-0.318333	-0.243333
1958:01	3.5056	3.04017	3.27154	2.94438	3.54662	3.55181	3.29791	-1.49	-0.938333	-0.88	-0.318333
1958:02	3.23741	3.5056	3.04017	3.27154	2.94438	3.54662	3.55181	-2.02667	-1.49	-0.938333	-0.88
1958:03	3.62527	3.23741	3.5056	3.04017	3.27154	2.94438	3.54662	-2.25833	-2.02667	-1.49	-0.938333
1958:04	3.61618	3.62527	3.23741	3.5056	3.04017	3.27154	2.94438	-2.88	-2.25833	-2.02667	-1.49
1958:05	3.35714	3.61618	3.62527	3.23741	3.5056	3.04017	3.27154	-2.79833	-2.88	-2.25833	-2.02667
1958:06	2.84596	3.35714	3.61618	3.62527	3.23741	3.5056	3.04017	-2.61833	-2.79833	-2.88	-2.25833
1958:07	2.48315	2.84596	3.35714	3.61618	3.62527	3.23741	3.5056	-2.73667	-2.61833	-2.79833	-2.88
1958:08	2.3338	2.48315	2.84596	3.35714	3.61618	3.62527	3.23741	-2.55833	-2.73667	-2.61833	-2.79833
1958:09	2.08333	2.3338	2.48315	2.84596	3.35714	3.61618	3.62527	-2.18833	-2.55833	-2.73667	-2.61833
1958:10	2.08333	2.08333	2.3338	2.48315	2.84596	3.35714	3.61618	-1.72833	-2.18833	-2.55833	-2.73667
1958:11	1.90074	2.08333	2.08333	2.3338	2.48315	2.84596	3.35714	-1.18333	-1.72833	-2.18833	-2.55833
1958:12	1.75623	1.90074	2.08333	2.08333	2.3338	2.48315	2.84596	-1.155	-1.18333	-1.72833	-2.18833
1959:01	1.2919	1.75623	1.90074	2.08333	2.08333	2.3338	2.48315	-0.936667	-1.155	-1.18333	-1.72833
1959:02	1.0453	1.2919	1.75623	1.90074	2.08333	2.08333	2.3338	-0.825	-0.936667	-1.155	-1.18333
1959:03	0.34638	1.0453	1.2919	1.75623	1.90074	2.08333	2.08333	-0.526667	-0.825	-0.936667	-1.155
1959:04	0.138217	0.34638	1.0453	1.2919	1.75623	1.90074	2.08333	-0.138333	-0.526667	-0.825	-0.936667
1959:05	0.345543	0.138217	0.34638	1.0453	1.2919	1.75623	1.90074	-0.0516667	-0.138333	-0.526667	-0.825
1959:06	0.691802	0.345543	0.138217	0.34638	1.0453	1.2919	1.75623	0.0383333	-0.0516667	-0.138333	-0.526667
1959:07	0.899965	0.691802	0.345543	0.138217	0.34638	1.0453	1.2919	-0.0733333	0.0383333	-0.0516667	-0.138333
1959:08	0.829302	0.899965	0.691802	0.345543	0.138217	0.34638	1.0453	-0.186667	-0.0733333	0.0383333	-0.0516667
1959:09	1.17606	0.829302	0.899965	0.691802	0.345543	0.138217	0.34638	-0.496667	-0.186667	-0.0733333	0.0383333
1959:10	1.52196	1.17606	0.829302	0.899965	0.691802	0.345543	0.138217	-0.696667	-0.496667	-0.186667	-0.0733333
1959:11	1.38169	1.52196	1.17606	0.829302	0.899965	0.691802	0.345543	-0.788333	-0.696667	-0.496667	-0.186667
1959:12	1.51881	1.38169	1.52196	1.17606	0.829302	0.899965	0.691802	-0.283333	-0.788333	-0.696667	-0.496667
1960:01	1.24095	1.51881	1.38169	1.52196	1.17606	0.829302	0.899965	-0.178333	-0.283333	-0.788333	-0.696667
1960:02	1.41379	1.24095	1.51881	1.38169	1.52196	1.17606	0.829302	0.223333	-0.178333	-0.283333	-0.788333
1960:03	1.51881	1.41379	1.24095	1.51881	1.38169	1.52196	1.17606	-0.363333	0.223333	-0.178333	-0.283333
1960:04	1.93237	1.51881	1.41379	1.24095	1.51881	1.38169	1.52196	-0.155	-0.363333	0.223333	-0.178333
1960:05	1.82507	1.93237	1.51881	1.41379	1.24095	1.51881	1.38169	-0.0416667	-0.155	-0.363333	0.223333
1960:06	1.71762	1.82507	1.93237	1.51881	1.41379	1.24095	1.51881	-0.321667	-0.0416667	-0.155	-0.363333
1960:07	1.37221	1.71762	1.82507	1.93237	1.51881	1.41379	1.24095	-0.396667	-0.321667	-0.0416667	-0.155
1960:08	1.47361	1.37221	1.71762	1.82507	1.93237	1.51881	1.41379	-0.473333	-0.396667	-0.321667	-0.0416667
1960:09	1.23077	1.47361	1.37221	1.71762	1.82507	1.93237	1.51881	-0.35	-0.473333	-0.396667	-0.321667
1960:10	1.36286	1.23077	1.47361	1.37221	1.71762	1.82507	1.93237	-0.92	-0.35	-0.473333	-0.396667
1960:11	1.46508	1.36286	1.23077	1.47361	1.37221	1.71762	1.82507	-0.888333	-0.92	-0.35	-0.473333
1960:12	1.36008	1.46508	1.36286	1.23077	1.47361	1.37221	1.71762	-1.34833	-0.888333	-0.92	-0.35
1961:01	1.60027	1.36008	1.46508	1.36286	1.23077	1.47361	1.37221	-1.305	-1.34833	-0.888333	-0.92
1961:02	1.46209	1.60027	1.36008	1.46508	1.36286	1.23077	1.47361	-1.555	-1.305	-1.34833	-0.888333
1961:03	1.46209	1.46209	1.60027	1.36008	1.46508	1.36286	1.23077	-1.51	-1.555	-1.305	-1.34833
1961:04	0.914015	1.46209	1.46209	1.60027	1.36008	1.46508	1.36286	-1.56	-1.51	-1.555	-1.305
1961:05	0.913088	0.914015	1.46209	1.46209	1.60027	1.36008	1.46508	-1.61333	-1.56	-1.51	-1.555
1961:06	0.776765	0.913088	0.914015	1.46209	1.46209	1.60027	1.36008	-1.37	-1.61333	-1.56	-1.51
1961:07	1.25212	0.776765	0.913088	0.914015	1.46209	1.46209	1.60027	-1.42667	-1.37	-1.61333	-1.56
1961:08	1.11449	1.25212	0.776765	0.913088	0.914015	1.46209	1.46209	-0.985	-1.42667	-1.37	-1.61333
1961:09	1.24958	1.11449	1.25212	0.776765	0.913088	0.914015	1.46209	-1.03833	-0.985	-1.42667	-1.37
1961:10	0.773109	1.24958	1.11449	1.25212	0.776765	0.913088	0.914015	-0.795	-1.03833	-0.985	-1.42667
1961:11	0.671592	0.773109	1.24958	1.11449	1.25212	0.776765	0.913088	-0.365	-0.795	-1.03833	-0.985
1961:12	0.670916	0.671592	0.773109	1.24958	1.11449	1.25212	0.776765	-0.235	-0.365	-0.795	-1.03833
1962:01	0.670241	0.670916	0.671592	0.773109	1.24958	1.11449	1.25212	-0.00833333	-0.235	-0.365	-0.795
1962:02	0.904826	0.670241	0.670916	0.671592	0.773109	1.24958	1.11449	0.318333	-0.00833333	-0.235	-0.365
1962:03	1.1059	0.904826	0.670241	0.670916	0.671592	0.773109	1.24958	0.25	0.318333	-0.00833333	-0.235
1962:04	1.34183	1.1059	0.904826	0.670241	0.670916	0.671592	0.773109	0.278333	0.25	0.318333	-0.00833333
1962:05	1.34048	1.34183	1.1059	0.904826	0.670241	0.670916	0.671592	0.401667	0.278333	0.25	0.318333
1962:06	1.23995	1.34048	1.34183	1.1059	0.904826	0.670241	0.670916	0.421667	0.401667	0.278333	0.25
1962:07	1.00267	1.23995	1.34048	1.34183	1.1059	0.904826	0.670241	0.541667	0.421667	0.401667	0.278333
1962:08	1.1356	1.00267	1.23995	1.34048	1.34183	1.1059	0.904826	0.268333	0.541667	0.421667	0.401667
1962:09	1.46765	1.1356	1.00267	1.23995	1.34048	1.34183	1.1059	0.388333	0.268333	0.541667	0.421667
1962:10	1.33422	1.46765	1.1356	1.00267	1.23995	1.34048	1.34183	0.603333	0.388333	0.268333	0.541667
1962:11	1.33422	1.33422	1.46765	1.1356	1.00267	1.23995	1.34048	0.313333	0.603333	0.388333	0.268333
1962:12	1.23292	1.33422	1.33422	1.46765	1.1356	1.00267	1.23995	0.518333	0.313333	0.603333	0.388333
1963:01	1.33156	1.23292	1.33422	1.33422	1.46765	1.1356	1.00267	0.316667	0.518333	0.313333	0.603333
1963:02	1.22883	1.33156	1.23292	1.33422	1.33422	1.46765	1.1356	0.108333	0.316667	0.518333	0.313333
1963:03	1.12695	1.22883	1.33156	1.23292	1.33422	1.33422	1.46765	0.291667	0.108333	0.316667	0.518333
1963:04	0.893744	1.12695	1.22883	1.33156	1.23292	1.33422	1.33422	0.263333	0.291667	0.108333	0.316667
1963:05	0.892857	0.893744	1.12695	1.22883	1.33156	1.23292	1.33422	0.0383333	0.263333	0.291667	0.108333
1963:06	1.32406	0.892857	0.893744	1.12695	1.22883	1.33156	1.23292	0.31	0.0383333	0.263333	0.291667
1963:07	1.55526	1.32406	0.892857	0.893744	1.12695	1.22883	1.33156	0.278333	0.31	0.0383333	0.263333
1963:08	1.55218	1.55526	1.32406	0.892857	0.893744	1.12695	1.22883	0.445	0.278333	0.31	0.0383333
1963:09	0.986193	1.55218	1.55526	1.32406	0.892857	0.893744	1.12695	0.318333	0.445	0.278333	0.31
1963:10	1.21791	0.986193	1.55218	1.55526	1.32406	0.892857	0.893744	0.298333	0.318333	0.445	0.278333
1963:11	1.31666	1.21791	0.986193	1.55218	1.55526	1.32406	0.892857	0.09	0.298333	0.318333	0.445
1963:12	1.64582	1.31666	1.21791	0.986193	1.55218	1.55526	1.32406	0.278333	0.09	0.298333	0.318333
1964:01	1.64258	1.64582	1.31666	1.21791	0.986193	1.55218	1.55526	0.171667	0.278333	0.09	0.298333
1964:02	1.41076	1.64258	1.64582	1.31666	1.21791	0.986193	1.55218	0.363333	0.171667	0.278333	0.09
1964:03	1.40937	1.41076	1.64258	1.64582	1.31666	1.21791	0.986193	0.36	0.363333	0.171667	0.278333
1964:04	1.54199	1.40937	1.41076	1.64258	1.64582	1.31666	1.21791	0.461667	0.36	0.363333	0.171667
1964:05	1.54048	1.54199	1.40937	1.41076	1.64258	1.64582	1.31666	0.661667	0.461667	0.36	0.363333
1964:06	1.30676	1.54048	1.54199	1.40937	1.41076	1.64258	1.64582	0.565	0.661667	0.461667	0.36
1964:07	1.07527	1.30676	1.54048	1.54199	1.40937	1.41076	1.64258	0.861667	0.565	0.661667	0.461667
1964:08	0.97561	1.07527	1.30676	1.54048	1.54199	1.40937	1.41076	0.758333	0.861667	0.565	0.661667
1964:09	1.17187	0.97561	1.07527	1.30676	1.54048	1.54199	1.40937	0.651667	0.758333	0.861667	0.565
1964:10	1.20325	1.17187	0.97561	1.07527	1.30676	1.54048	1.54199	0.641667	0.651667	0.758333	0.861667
1964:11	1.39701	1.20325	1.17187	0.97561	1.07527	1.30676	1.54048	0.925	0.641667	0.651667	0.758333
1964:12	1.19819	1.39701	1.20325	1.17187	0.97561	1.07527	1.30676	0.72	0.925	0.641667	0.651667
1965:01	1.0989	1.19819	1.39701	1.20325	1.17187	0.97561	1.07527	0.815	0.72	0.925	0.641667
1965:02	1.19702	1.0989	1.19819	1.39701	1.20325	1.17187	0.97561	0.62	0.815	0.72	0.925
1965:03	1.19586	1.19702	1.0989	1.19819	1.39701	1.20325	1.17187	1.00833	0.62	0.815	0.72
1965:04	1.38934	1.19586	1.19702	1.0989	1.19819	1.39701	1.20325	0.901667	1.00833	0.62	0.815
1965:05	1.61394	1.38934	1.19586	1.19702	1.0989	1.19819	1.39701	1.09333	0.901667	1.00833	0.62
1965:06	1.93486	1.61394	1.38934	1.19586	1.19702	1.0989	1.19819	1.08	1.09333	0.901667	1.00833
1965:07	1.80529	1.93486	1.61394	1.38934	1.19586	1.19702	1.0989	1.26167	1.08	1.09333	0.901667
1965:08	1.61031	1.80529	1.93486	1.61394	1.38934	1.19586	1.19702	1.24167	1.26167	1.08	1.09333
1965:09	1.73745	1.61031	1.80529	1.93486	1.61394	1.38934	1.19586	1.32167	1.24167	1.26167	1.08
1965:10	1.70308	1.73745	1.61031	1.80529	1.93486	1.61394	1.38934	1.39	1.32167	1.24167	1.26167
1965:11	1.73021	1.70308	1.73745	1.61031	1.80529	1.93486	1.61394	1.45667	1.39	1.32167	1.24167
1965:12	1.92	1.73021	1.70308	1.73745	1.61031	1.80529	1.93486	1.51333	1.45667	1.39	1.32167
1966:01	1.91816	1.92	1.73021	1.70308	1.73745	1.61031	1.80529	1.47	1.51333	1.45667	1.39
1966:02	2.55754	1.91816	1.92	1.73021	1.70308	1.73745	1.61031	1.61833	1.47	1.51333	1.45667
1966:03	2.77866	2.55754	1.91816	1.92	1.73021	1.70308	1.73745	1.56667	1.61833	1.47	1.51333
1966:04	2.86807	2.77866	2.55754	1.91816	1.92	1.73021	1.70308	1.51333	1.56667	1.61833	1.47
1966:05	2.76366	2.86807	2.77866	2.55754	1.91816	1.92	1.73021	1.36	1.51333	1.56667	1.61833
1966:06	2.43594	2.76366	2.86807	2.77866	2.55754	1.91816	1.92	1.40833	1.36	1.51333	1.56667
1966:07	2.75491	2.43594	2.76366	2.86807	2.77866	2.55754	1.91816	1.355	1.40833	1.36	1.51333
1966:08	3.48653	2.75491	2.43594	2.76366	2.86807	2.77866	2.55754	1.30833	1.355	1.40833	1.36
1966:09	3.57369	3.48653	2.75491	2.43594	2.76366	2.86807	2.77866	1.35833	1.30833	1.355	1.40833
1966:10	3.79147	3.57369	3.48653	2.75491	2.43594	2.76366	2.86807	1.31167	1.35833	1.30833	1.355
1966:11	3.55906	3.79147	3.57369	3.48653	2.75491	2.43594	2.76366	1.37	1.31167	1.35833	1.30833
1966:12	3.3595	3.55906	3.79147	3.57369	3.48653	2.75491	2.43594	1.13333	1.37	1.31167	1.35833
1967:01	3.1995	3.3595	3.55906	3.79147	3.57369	3.48653	2.75491	1.00167	1.13333	1.37	1.31167
1967:02	2.86783	3.1995	3.3595	3.55906	3.79147	3.57369	3.48653	1.07333	1.00167	1.13333	1.37
1967:03	2.54817	2.86783	3.1995	3.3595	3.55906	3.79147	3.57369	1.04333	1.07333	1.00167	1.13333
1967:04	2.54027	2.54817	2.86783	3.1995	3.3595	3.55906	3.79147	1.01333	1.04333	1.07333	1.00167
1967:05	2.31839	2.54027	2.54817	2.86783	3.1995	3.3595	3.55906	0.985	1.01333	1.04333	1.07333
1967:06	2.84126	2.31839	2.54027	2.54817	2.86783	3.1995	3.3595	0.858333	0.985	1.01333	1.04333
1967:07	2.92758	2.84126	2.31839	2.54027	2.54817	2.86783	3.1995	0.931667	0.858333	0.985	1.01333
1967:08	2.60337	2.92758	2.84126	2.31839	2.54027	2.54817	2.86783	0.9	0.931667	0.858333	0.985
1967:09	2.59542	2.60337	2.92758	2.84126	2.31839	2.54027	2.54817	0.87	0.9	0.931667	0.858333
1967:10	2.58752	2.59542	2.60337	2.92758	2.84126	2.31839	2.54027	0.646667	0.87	0.9	0.931667
1967:11	3.10219	2.58752	2.59542	2.60337	2.92758	2.84126	2.31839	0.716667	0.646667	0.87	0.9
1967:12	3.28068	3.10219	2.58752	2.59542	2.60337	2.92758	2.84126	0.788333	0.716667	0.646667	0.87
1968:01	3.64742	3.28068	3.10219	2.58752	2.59542	2.60337	2.92758	0.855	0.788333	0.716667	0.646667
1968:02	3.63636	3.64742	3.28068	3.10219	2.58752	2.59542	2.60337	0.72	0.855	0.788333	0.716667
1968:03	3.93939	3.63636	3.64742	3.28068	3.10219	2.58752	2.59542	0.786667	0.72	0.855	0.788333
1968:04	3.92749	3.93939	3.63636	3.64742	3.28068	3.10219	2.58752	0.95	0.786667	0.72	0.855
1968:05	4.22961	3.92749	3.93939	3.63636	3.64742	3.28068	3.10219	0.91	0.95	0.786667	0.72
1968:06	4.2042	4.22961	3.92749	3.93939	3.63636	3.64742	3.28068	0.678333	0.91	0.95	0.786667
1968:07	4.49102	4.2042	4.22961	3.92749	3.93939	3.63636	3.64742	0.646667	0.678333	0.91	0.95
1968:08	4.47761	4.49102	4.2042	4.22961	3.92749	3.93939	3.63636	0.815	0.646667	0.678333	0.91
1968:09	4.46429	4.47761	4.49102	4.2042	4.22961	3.92749	3.93939	0.88	0.815	0.646667	0.678333
1968:10	4.74777	4.46429	4.47761	4.49102	4.2042	4.22961	3.92749	0.845	0.88	0.815	0.646667
1968:11	4.42478	4.74777	4.46429	4.47761	4.49102	4.2042	4.22961	0.806667	0.845	0.88	0.815
1968:12	4.70588	4.42478	4.74777	4.46429	4.47761	4.49102	4.2042	0.771667	0.806667	0.845	0.88
1969:01	4.69208	4.70588	4.42478	4.74777	4.46429	4.47761	4.49102	0.735	0.771667	0.806667	0.845
1969:02	4.67836	4.69208	4.70588	4.42478	4.74777	4.46429	4.47761	0.701667	0.735	0.771667	0.806667
1969:03	5.24781	4.67836	4.69208	4.70588	4.42478	4.74777	4.46429	0.668333	0.701667	0.735	0.771667
1969:04	5.52326	5.24781	4.67836	4.69208	4.70588	4.42478	4.74777	0.636667	0.668333	0.701667	0.735
1969:05	5.50725	5.52326	5.24781	4.67836	4.69208	4.70588	4.42478	0.608333	0.636667	0.668333	0.701667
1969:06	5.4755	5.50725	5.52326	5.24781	4.67836	4.69208	4.70588	0.48	0.608333	0.636667	0.668333
1969:07	5.44413	5.4755	5.50725	5.52326	5.24781	4.67836	4.69208	0.456667	0.48	0.608333	0.636667
1969:08	5.42857	5.44413	5.4755	5.50725	5.52326	5.24781	4.67836	0.431667	0.456667	0.48	0.608333
1969:09	5.69801	5.42857	5.44413	5.4755	5.50725	5.52326	5.24781	0.208333	0.431667	0.456667	0.48
1969:10	5.66572	5.69801	5.42857	5.44413	5.4755	5.50725	5.52326	0.185	0.208333	0.431667	0.456667
1969:11	5.9322	5.66572	5.69801	5.42857	5.44413	5.4755	5.50725	0.363333	0.185	0.208333	0.431667
1969:12	5.89888	5.9322	5.66572	5.69801	5.42857	5.44413	5.4755	0.338333	0.363333	0.185	0.208333
1970:01	6.16246	5.89888	5.9322	5.66572	5.69801	5.42857	5.44413	-0.0783333	0.338333	0.363333	0.185
1970:02	6.42458	6.16246	5.89888	5.9322	5.66572	5.69801	5.42857	-0.393333	-0.0783333	0.338333	0.363333
1970:03	6.09418	6.42458	6.16246	5.89888	5.9322	5.66572	5.69801	-0.598333	-0.393333	-0.0783333	0.338333
1970:04	6.06061	6.09418	6.42458	6.16246	5.89888	5.9322	5.66572	-0.801667	-0.598333	-0.393333	-0.0783333
1970:05	6.04396	6.06061	6.09418	6.42458	6.16246	5.89888	5.9322	-0.998333	-0.801667	-0.598333	-0.393333
1970:06	6.01093	6.04396	6.06061	6.09418	6.42458	6.16246	5.89888	-1.09333	-0.998333	-0.801667	-0.598333
1970:07	5.70652	6.01093	6.04396	6.06061	6.09418	6.42458	6.16246	-1.18333	-1.09333	-0.998333	-0.801667
1970:08	5.69106	5.70652	6.01093	6.04396	6.06061	6.09418	6.42458	-1.27167	-1.18333	-1.09333	-0.998333
1970:09	5.66038	5.69106	5.70652	6.01093	6.04396	6.06061	6.09418	-1.55333	-1.27167	-1.18333	-1.09333
1970:10	5.63003	5.66038	5.69106	5.70652	6.01093	6.04396	6.06061	-1.63167	-1.55333	-1.27167	-1.18333
1970:11	5.6	5.63003	5.66038	5.69106	5.70652	6.01093	6.04396	-2.00167	-1.63167	-1.55333	-1.27167
1970:12	5.57029	5.6	5.63003	5.66038	5.69106	5.70652	6.01093	-2.16667	-2.00167	-1.63167	-1.55333
1971:01	5.27704	5.57029	5.6	5.63003	5.66038	5.69106	5.70652	-1.935	-2.16667	-2.00167	-1.63167
1971:02	4.72441	5.27704	5.57029	5.6	5.63003	5.66038	5.69106	-1.9	-1.935	-2.16667	-2.00167
1971:03	4.43864	4.72441	5.27704	5.57029	5.6	5.63003	5.66038	-1.96333	-1.9	-1.935	-2.16667
1971:04	4.15584	4.43864	4.72441	5.27704	5.57029	5.6	5.63003	-1.82833	-1.96333	-1.9	-1.935
1971:05	4.40415	4.15584	4.43864	4.72441	5.27704	5.57029	5.6	-1.795	-1.82833	-1.96333	-1.9
1971:06	4.38144	4.40415	4.15584	4.43864	4.72441	5.27704	5.57029	-1.76	-1.795	-1.82833	-1.96333
1971:07	4.37018	4.38144	4.40415	4.15584	4.43864	4.72441	5.27704	-1.82333	-1.76	-1.795	-1.82833
1971:08	4.35897	4.37018	4.38144	4.40415	4.15584	4.43864	4.72441	-1.885	-1.82333	-1.76	-1.795
1971:09	4.08163	4.35897	4.37018	4.38144	4.40415	4.15584	4.43864	-1.74667	-1.885	-1.82333	-1.76
1971:10	3.80711	4.08163	4.35897	4.37018	4.38144	4.40415	4.15584	-1.51167	-1.74667	-1.885	-1.82333
1971:11	3.53535	3.80711	4.08163	4.35897	4.37018	4.38144	4.40415	-1.67167	-1.51167	-1.74667	-1.885
1971:12	3.26633	3.53535	3.80711	4.08163	4.35897	4.37018	4.38144	-1.635	-1.67167	-1.51167	-1.74667
1972:01	3.25815	3.26633	3.53535	3.80711	4.08163	4.35897	4.37018	-1.40333	-1.635	-1.67167	-1.51167
1972:02	3.7594	3.25815	3.26633	3.53535	3.80711	4.08163	4.35897	-1.27167	-1.40333	-1.635	-1.67167
1972:03	3.5	3.7594	3.25815	3.26633	3.53535	3.80711	4.08163	-1.33833	-1.27167	-1.40333	-1.635
1972:04	3.49127	3.5	3.7594	3.25815	3.26633	3.53535	3.80711	-1.20667	-1.33833	-1.27167	-1.40333
1972:05	3.22581	3.49127	3.5	3.7594	3.25815	3.26633	3.53535	-1.175	-1.20667	-1.33833	-1.27167
1972:06	2.96296	3.22581	3.49127	3.5	3.7594	3.25815	3.26633	-1.145	-1.175	-1.20667	-1.33833
1972:07	2.95567	2.96296	3.22581	3.49127	3.5	3.7594	3.25815	-1.015	-1.145	-1.175	-1.20667
1972:08	2.9484	2.95567	2.96296	3.22581	3.49127	3.5	3.7594	-0.985	-1.015	-1.145	-1.175
1972:09	3.18627	2.9484	2.95567	2.96296	3.22581	3.49127	3.5	-0.856667	-0.985	-1.015	-1.145
1972:10	3.17848	3.18627	2.9484	2.95567	2.96296	3.22581	3.49127	-0.93	-0.856667	-0.985	-1.015
1972:11	3.41463	3.17848	3.18627	2.9484	2.95567	2.96296	3.22581	-0.606667	-0.93	-0.856667	-0.985
1972:12	3.40633	3.41463	3.17848	3.18627	2.9484	2.95567	2.96296	-0.483333	-0.606667	-0.93	-0.856667
1973:01	3.64078	3.40633	3.41463	3.17848	3.18627	2.9484	2.95567	-0.163333	-0.483333	-0.606667	-0.93
1973:02	3.86473	3.64078	3.40633	3.41463	3.17848	3.18627	2.9484	-0.243333	-0.163333	-0.483333	-0.606667
1973:03	4.83092	3.86473	3.64078	3.40633	3.41463	3.17848	3.18627	-0.123333	-0.243333	-0.163333	-0.483333
1973:04	5.3012	4.83092	3.86473	3.64078	3.40633	3.41463	3.17848	-0.198333	-0.123333	-0.243333	-0.163333
1973:05	5.52885	5.3012	4.83092	3.86473	3.64078	3.40633	3.41463	-0.075	-0.198333	-0.123333	-0.243333
1973:06	5.9952	5.52885	5.3012	4.83092	3.86473	3.64078	3.40633	-0.055	-0.075	-0.198333	-0.123333
1973:07	5.74163	5.9952	5.52885	5.3012	4.83092	3.86473	3.64078	0.0633333	-0.055	-0.075	-0.198333
1973:08	7.39857	5.74163	5.9952	5.52885	5.3012	4.83092	3.86473	0.085	0.0633333	-0.055	-0.075
1973:09	7.36342	7.39857	5.74163	5.9952	5.52885	5.3012	4.83092	0.108333	0.085	0.0633333	-0.055
1973:10	8.05687	7.36342	7.39857	5.74163	5.9952	5.52885	5.3012	0.328333	0.108333	0.085	0.0633333
1973:11	8.25472	8.05687	7.36342	7.39857	5.74163	5.9952	5.52885	0.151667	0.328333	0.108333	0.085
1973:12	8.94118	8.25472	8.05687	7.36342	7.39857	5.74163	5.9952	0.0766667	0.151667	0.328333	0.108333
1974:01	9.60187	8.94118	8.25472	8.05687	7.36342	7.39857	5.74163	-0.095	0.0766667	0.151667	0.328333
1974:02	10	9.60187	8.94118	8.25472	8.05687	7.36342	7.39857	-0.165	-0.095	0.0766667	0.151667
1974:03	10.1382	10	9.60187	8.94118	8.25472	8.05687	7.36342	-0.0366667	-0.165	-0.095	0.0766667
1974:04	10.0686	10.1382	10	9.60187	8.94118	8.25472	8.05687	-0.00833333	-0.0366667	-0.165	-0.095
1974:05	10.7062	10.0686	10.1382	10	9.60187	8.94118	8.25472	0.02	-0.00833333	-0.0366667	-0.165
1974:06	10.8597	10.7062	10.0686	10.1382	10	9.60187	8.94118	-0.248333	0.02	-0.00833333	-0.0366667
1974:07	11.5385	10.8597	10.7062	10.0686	10.1382	10	9.60187	-0.315	-0.248333	0.02	-0.00833333
1974:08	10.8889	11.5385	10.8597	10.7062	10.0686	10.1382	10	-0.281667	-0.315	-0.248333	0.02
1974:09	11.9469	10.8889	11.5385	10.8597	10.7062	10.0686	10.1382	-0.645	-0.281667	-0.315	-0.248333
1974:10	11.8421	11.9469	10.8889	11.5385	10.8597	10.7062	10.0686	-0.706667	-0.645	-0.281667	-0.315
1974:11	12.2004	11.8421	11.9469	10.8889	11.5385	10.8597	10.7062	-1.255	-0.706667	-0.645	-0.281667
1974:12	12.095	12.2004	11.8421	11.9469	10.8889	11.5385	10.8597	-1.79333	-1.255	-0.706667	-0.645
1975:01	11.7521	12.095	12.2004	11.8421	11.9469	10.8889	11.5385	-2.62333	-1.79333	-1.255	-0.706667
1975:02	11.2051	11.7521	12.095	12.2004	11.8421	11.9469	10.8889	-2.55833	-2.62333	-1.79333	-1.255
1975:03	10.4603	11.2051	11.7521	12.095	12.2004	11.8421	11.9469	-2.98833	-2.55833	-2.62333	-1.79333
1975:04	10.1871	10.4603	11.2051	11.7521	12.095	12.2004	11.8421	-3.11833	-2.98833	-2.55833	-2.62333
1975:05	9.25926	10.1871	10.4603	11.2051	11.7521	12.095	12.2004	-3.24833	-3.11833	-2.98833	-2.55833
1975:06	9.18367	9.25926	10.1871	10.4603	11.2051	11.7521	12.095	-2.98333	-3.24833	-3.11833	-2.98833
1975:07	9.53347	9.18367	9.25926	10.1871	10.4603	11.2051	11.7521	-2.72333	-2.98333	-3.24833	-3.11833
1975:08	8.61723	9.53347	9.18367	9.25926	10.1871	10.4603	11.2051	-2.46833	-2.72333	-2.98333	-3.24833
1975:09	7.90514	8.61723	9.53347	9.18367	9.25926	10.1871	10.4603	-2.41833	-2.46833	-2.72333	-2.98333
1975:10	7.64706	7.90514	8.61723	9.53347	9.18367	9.25926	10.1871	-2.37	-2.41833	-2.46833	-2.72333
1975:11	7.37864	7.64706	7.90514	8.61723	9.53347	9.18367	9.25926	-2.23	-2.37	-2.41833	-2.46833
1975:12	7.12909	7.37864	7.64706	7.90514	8.61723	9.53347	9.18367	-2.095	-2.23	-2.37	-2.41833
1976:01	6.69216	7.12909	7.37864	7.64706	7.90514	8.61723	9.53347	-1.76167	-2.095	-2.23	-2.37
1976:02	6.27376	6.69216	7.12909	7.37864	7.64706	7.90514	8.61723	-1.53167	-1.76167	-2.095	-2.23
1976:03	6.06061	6.27376	6.69216	7.12909	7.37864	7.64706	7.90514	-1.405	-1.53167	-1.76167	-2.095
1976:04	5.84906	6.06061	6.27376	6.69216	7.12909	7.37864	7.64706	-1.475	-1.405	-1.53167	-1.76167
1976:05	6.21469	5.84906	6.06061	6.27376	6.69216	7.12909	7.37864	-1.15	-1.475	-1.405	-1.53167
1976:06	5.98131	6.21469	5.84906	6.06061	6.27376	6.69216	7.12909	-1.32167	-1.15	-1.475	-1.405
1976:07	5.55556	5.98131	6.21469	5.84906	6.06061	6.27376	6.69216	-1.49167	-1.32167	-1.15	-1.475
1976:08	5.71956	5.55556	5.98131	6.21469	5.84906	6.06061	6.27376	-1.46333	-1.49167	-1.32167	-1.15
1976:09	5.49451	5.71956	5.55556	5.98131	6.21469	5.84906	6.06061	-1.23667	-1.46333	-1.49167	-1.32167
1976:10	5.46448	5.49451	5.71956	5.55556	5.98131	6.21469	5.84906	-1.305	-1.23667	-1.46333	-1.49167
1976:11	5.06329	5.46448	5.49451	5.71956	5.55556	5.98131	6.21469	-1.375	-1.305	-1.23667	-1.46333
1976:12	5.03597	5.06329	5.46448	5.49451	5.71956	5.55556	5.98131	-1.345	-1.375	-1.305	-1.23667
1977:01	5.19713	5.03597	5.06329	5.46448	5.49451	5.71956	5.55556	-1.01667	-1.345	-1.375	-1.305
1977:02	6.08229	5.19713	5.03597	5.06329	5.46448	5.49451	5.71956	-1.085	-1.01667	-1.345	-1.375
1977:03	6.42857	6.08229	5.19713	5.03597	5.06329	5.46448	5.49451	-0.858333	-1.085	-1.01667	-1.345
1977:04	6.95187	6.42857	6.08229	5.19713	5.03597	5.06329	5.46448	-0.633333	-0.858333	-1.085	-1.01667
1977:05	6.73759	6.95187	6.42857	6.08229	5.19713	5.03597	5.06329	-0.411667	-0.633333	-0.858333	-1.085
1977:06	6.70194	6.73759	6.95187	6.42857	6.08229	5.19713	5.03597	-0.586667	-0.411667	-0.633333	-0.858333
1977:07	6.66667	6.70194	6.73759	6.95187	6.42857	6.08229	5.19713	-0.265	-0.586667	-0.411667	-0.633333
1977:08	6.63176	6.66667	6.70194	6.73759	6.95187	6.42857	6.08229	-0.341667	-0.265	-0.586667	-0.411667
1977:09	6.42361	6.63176	6.66667	6.70194	6.73759	6.95187	6.42857	-0.12	-0.341667	-0.265	-0.586667
1977:10	6.39033	6.42361	6.63176	6.66667	6.70194	6.73759	6.95187	-0.1	-0.12	-0.341667	-0.265
1977:11	6.71256	6.39033	6.42361	6.63176	6.66667	6.70194	6.73759	-0.075	-0.1	-0.12	-0.341667
1977:12	6.67808	6.71256	6.39033	6.42361	6.63176	6.66667	6.70194	0.345	-0.075	-0.1	-0.12
1978:01	6.81431	6.67808	6.71256	6.39033	6.42361	6.63176	6.66667	0.37	0.345	-0.075	-0.1
1978:02	6.23946	6.81431	6.67808	6.71256	6.39033	6.42361	6.63176	0.491667	0.37	0.345	-0.075
1978:03	6.37584	6.23946	6.81431	6.67808	6.71256	6.39033	6.42361	0.515	0.491667	0.37	0.345
1978:04	6.5	6.37584	6.23946	6.81431	6.67808	6.71256	6.39033	0.733333	0.515	0.491667	0.37
1978:05	7.14286	6.5	6.37584	6.23946	6.81431	6.67808	6.71256	0.851667	0.733333	0.515	0.491667
1978:06	7.43802	7.14286	6.5	6.37584	6.23946	6.81431	6.67808	0.968333	0.851667	0.733333	0.515
1978:07	7.73026	7.43802	7.14286	6.5	6.37584	6.23946	6.81431	0.691667	0.968333	0.851667	0.733333
1978:08	7.85597	7.73026	7.43802	7.14286	6.5	6.37584	6.23946	1.01	0.691667	0.968333	0.851667
1978:09	8.48287	7.85597	7.73026	7.43802	7.14286	6.5	6.37584	0.93	1.01	0.691667	0.968333
1978:10	8.92857	8.48287	7.85597	7.73026	7.43802	7.14286	6.5	1.15	0.93	1.01	0.691667
1978:11	8.87097	8.92857	8.48287	7.85597	7.73026	7.43802	7.14286	1.06833	1.15	0.93	1.01
1978:12	8.98876	8.87097	8.92857	8.48287	7.85597	7.73026	7.43802	0.986667	1.06833	1.15	0.93
1979:01	9.2504	8.98876	8.87097	8.92857	8.48287	7.85597	7.73026	1.1	0.986667	1.06833	1.15
1979:02	9.84127	9.2504	8.98876	8.87097	8.92857	8.48287	7.85597	1.11167	1.1	0.986667	1.06833
1979:03	10.2524	9.84127	9.2504	8.98876	8.87097	8.92857	8.48287	1.22333	1.11167	1.1	0.986667
1979:04	10.4851	10.2524	9.84127	9.2504	8.98876	8.87097	8.92857	1.235	1.22333	1.11167	1.1
1979:05	10.6977	10.4851	10.2524	9.84127	9.2504	8.98876	8.87097	1.44333	1.235	1.22333	1.11167
1979:06	11.0769	10.6977	10.4851	10.2524	9.84127	9.2504	8.98876	1.34833	1.44333	1.235	1.22333
1979:07	11.4504	11.0769	10.6977	10.4851	10.2524	9.84127	9.2504	1.35167	1.34833	1.44333	1.235
1979:08	11.8361	11.4504	11.0769	10.6977	10.4851	10.2524	9.84127	1.06	1.35167	1.34833	1.44333
1979:09	11.8797	11.8361	11.4504	11.0769	10.6977	10.4851	10.2524	1.16	1.06	1.35167	1.34833
1979:10	12.0715	11.8797	11.8361	11.4504	11.0769	10.6977	10.4851	1.06	1.16	1.06	1.35167
1979:11	12.5926	12.0715	11.8797	11.8361	11.4504	11.0769	10.6977	1.14833	1.06	1.16	1.06
1979:12	13.2548	12.5926	12.0715	11.8797	11.8361	11.4504	11.0769	1.02833	1.14833	1.06	1.16
1980:01	13.8686	13.2548	12.5926	12.0715	11.8797	11.8361	11.4504	0.698333	1.02833	1.14833	1.06
1980:02	14.1618	13.8686	13.2548	12.5926	12.0715	11.8797	11.8361	0.668333	0.698333	1.02833	1.14833
1980:03	14.5923	14.1618	13.8686	13.2548	12.5926	12.0715	11.8797	0.63	0.668333	0.698333	1.02833
1980:04	14.5892	14.5923	14.1618	13.8686	13.2548	12.5926	12.0715	-0.00166667	0.63	0.668333	0.698333
1980:05	14.4258	14.5892	14.5923	14.1618	13.8686	13.2548	12.5926	-0.626667	-0.00166667	0.63	0.668333
1980:06	14.2659	14.4258	14.5892	14.5923	14.1618	13.8686	13.2548	-0.746667	-0.626667	-0.00166667	0.63
1980:07	13.1507	14.2659	14.4258	14.5892	14.5923	14.1618	13.8686	-0.96	-0.746667	-0.626667	-0.00166667
1980:08	12.8901	13.1507	14.2659	14.4258	14.5892	14.5923	14.1618	-0.871667	-0.96	-0.746667	-0.626667
1980:09	12.7688	12.8901	13.1507	14.2659	14.4258	14.5892	14.5923	-0.686667	-0.871667	-0.96	-0.746667
1980:10	12.633	12.7688	12.8901	13.1507	14.2659	14.4258	14.5892	-0.701667	-0.686667	-0.871667	-0.96
1980:11	12.6316	12.633	12.7688	12.8901	13.1507	14.2659	14.4258	-0.715	-0.701667	-0.686667	-0.871667
1980:12	12.3537	12.6316	12.633	12.7688	12.8901	13.1507	14.2659	-0.431667	-0.715	-0.701667	-0.686667
1981:01	11.7949	12.3537	12.6316	12.633	12.7688	12.8901	13.1507	-0.738333	-0.431667	-0.715	-0.701667
1981:02	11.3924	11.7949	12.3537	12.6316	12.633	12.7688	12.8901	-0.643333	-0.738333	-0.431667	-0.715
1981:03	10.6117	11.3924	11.7949	12.3537	12.6316	12.633	12.7688	-0.646667	-0.643333	-0.738333	-0.431667
1981:04	10.136	10.6117	11.3924	11.7949	12.3537	12.6316	12.633	-0.455	-0.646667	-0.643333	-0.738333
1981:05	9.79192	10.136	10.6117	11.3924	11.7949	12.3537	12.6316	-0.753333	-0.455	-0.646667	-0.643333
1981:06	9.69697	9.79192	10.136	10.6117	11.3924	11.7949	12.3537	-0.755	-0.753333	-0.455	-0.646667
1981:07	10.7748	9.69697	9.79192	10.136	10.6117	11.3924	11.7949	-0.465	-0.755	-0.753333	-0.455
1981:08	10.8173	10.7748	9.69697	9.79192	10.136	10.6117	11.3924	-0.671667	-0.465	-0.755	-0.753333
1981:09	10.9654	10.8173	10.7748	9.69697	9.79192	10.136	10.6117	-0.871667	-0.671667	-0.465	-0.755
1981:10	10.2715	10.9654	10.8173	10.7748	9.69697	9.79192	10.136	-1.16833	-0.871667	-0.671667	-0.465
1981:11	9.57944	10.2715	10.9654	10.8173	10.7748	9.69697	9.79192	-1.56	-1.16833	-0.871667	-0.671667
1981:12	8.91204	9.57944	10.2715	10.9654	10.8173	10.7748	9.69697	-1.74833	-1.56	-1.16833	-0.871667
1982:01	8.25688	8.91204	9.57944	10.2715	10.9654	10.8173	10.7748	-1.83	-1.74833	-1.56	-1.16833
1982:02	7.61364	8.25688	8.91204	9.57944	10.2715	10.9654	10.8173	-2.10833	-1.83	-1.74833	-1.56
1982:03	6.88488	7.61364	8.25688	8.91204	9.57944	10.2715	10.9654	-2.18167	-2.10833	-1.83	-1.74833
1982:04	6.62177	6.88488	7.61364	8.25688	8.91204	9.57944	10.2715	-2.44667	-2.18167	-2.10833	-1.83
1982:05	6.91193	6.62177	6.88488	7.61364	8.25688	8.91204	9.57944	-2.50667	-2.44667	-2.18167	-2.10833
1982:06	7.18232	6.91193	6.62177	6.88488	7.61364	8.25688	8.91204	-2.66667	-2.50667	-2.44667	-2.18167
1982:07	6.55738	7.18232	6.91193	6.62177	6.88488	7.61364	8.25688	-2.81833	-2.66667	-2.50667	-2.44667
1982:08	5.96529	6.55738	7.18232	6.91193	6.62177	6.88488	7.61364	-2.77167	-2.81833	-2.66667	-2.50667
1982:09	4.94092	5.96529	6.55738	7.18232	6.91193	6.62177	6.88488	-3.01667	-2.77167	-2.81833	-2.66667
1982:10	5.03212	4.94092	5.96529	6.55738	7.18232	6.91193	6.62177	-3.25667	-3.01667	-2.77167	-2.81833
1982:11	4.47761	5.03212	4.94092	5.96529	6.55738	7.18232	6.91193	-3.59	-3.25667	-3.01667	-2.77167
1982:12	3.82572	4.47761	5.03212	4.94092	5.96529	6.55738	7.18232	-3.51667	-3.59	-3.25667	-3.01667
1983:01	3.70763	3.82572	4.47761	5.03212	4.94092	5.96529	6.55738	-3.05	-3.51667	-3.59	-3.25667
1983:02	3.48469	3.70763	3.82572	4.47761	5.03212	4.94092	5.96529	-2.98167	-3.05	-3.51667	-3.59
1983:03	3.59029	3.48469	3.70763	3.82572	4.47761	5.03212	4.94092	-2.815	-2.98167	-3.05	-3.51667
1983:04	4	3.59029	3.48469	3.70763	3.82572	4.47761	5.03212	-2.64667	-2.815	-2.98167	-3.05
1983:05	3.44108	4	3.59029	3.48469	3.70763	3.82572	4.47761	-2.47833	-2.64667	-2.815	-2.98167
1983:06	2.47423	3.44108	4	3.59029	3.48469	3.70763	3.82572	-2.40833	-2.47833	-2.64667	-2.815
1983:07	2.35897	2.47423	3.44108	4	3.59029	3.48469	3.70763	-1.655	-2.40833	-2.47833	-2.64667
1983:08	2.4565	2.35897	2.47423	3.44108	4	3.59029	3.48469	-1.695	-1.655	-2.40833	-2.47833
1983:09	2.76356	2.4565	2.35897	2.47423	3.44108	4	3.59029	-1.34167	-1.695	-1.655	-2.40833
1983:10	2.75229	2.76356	2.4565	2.35897	2.47423	3.44108	4	-0.891667	-1.34167	-1.695	-1.655
1983:11	3.16327	2.75229	2.76356	2.4565	2.35897	2.47423	3.44108	-0.548333	-0.891667	-1.34167	-1.695
1983:12	3.7871	3.16327	2.75229	2.76356	2.4565	2.35897	2.47423	-0.31	-0.548333	-0.891667	-1.34167
1984:01	4.29009	3.7871	3.16327	2.75229	2.76356	2.4565	2.35897	0.025	-0.31	-0.548333	-0.891667
1984:02	4.69388	4.29009	3.7871	3.16327	2.75229	2.76356	2.4565	0.256667	0.025	-0.31	-0.548333
1984:03	4.89297	4.69388	4.29009	3.7871	3.16327	2.75229	2.76356	0.29	0.256667	0.025	-0.31
1984:04	4.55466	4.89297	4.69388	4.29009	3.7871	3.16327	2.75229	0.421667	0.29	0.256667	0.025
1984:05	4.33468	4.55466	4.89297	4.69388	4.29009	3.7871	3.16327	0.751667	0.421667	0.29	0.256667
1984:06	4.32596	4.33468	4.55466	4.89297	4.69388	4.29009	3.7871	0.976667	0.751667	0.421667	0.29
1984:07	4.30862	4.32596	4.33468	4.55466	4.89297	4.69388	4.29009	0.706667	0.976667	0.751667	0.421667
1984:08	4.2957	4.30862	4.32596	4.33468	4.55466	4.89297	4.69388	0.731667	0.706667	0.976667	0.751667
1984:09	4.28287	4.2957	4.30862	4.32596	4.33468	4.55466	4.89297	0.955	0.731667	0.706667	0.976667
1984:10	4.26587	4.28287	4.2957	4.30862	4.32596	4.33468	4.55466	0.878333	0.955	0.731667	0.706667
1984:11	4.1543	4.26587	4.28287	4.2957	4.30862	4.32596	4.33468	1.1	0.878333	0.955	0.731667
1984:12	4.04339	4.1543	4.26587	4.28287	4.2957	4.30862	4.32596	1.02167	1.1	0.878333	0.955
1985:01	3.52595	4.04339	4.1543	4.26587	4.28287	4.2957	4.30862	1.03833	1.02167	1.1	0.878333
1985:02	3.60624	3.52595	4.04339	4.1543	4.26587	4.28287	4.2957	1.15333	1.03833	1.02167	1.1
1985:03	3.79009	3.60624	3.52595	4.04339	4.1543	4.26587	4.28287	1.16833	1.15333	1.03833	1.02167
1985:04	3.5818	3.79009	3.60624	3.52595	4.04339	4.1543	4.26587	1.075	1.16833	1.15333	1.03833
1985:05	3.57488	3.5818	3.79009	3.60624	3.52595	4.04339	4.1543	1.17	1.075	1.16833	1.15333
1985:06	3.66442	3.57488	3.5818	3.79009	3.60624	3.52595	4.04339	0.966667	1.17	1.075	1.16833
1985:07	3.45821	3.66442	3.57488	3.5818	3.79009	3.60624	3.52595	0.96	0.966667	1.17	1.075
1985:08	3.35249	3.45821	3.66442	3.57488	3.5818	3.79009	3.60624	1.25	0.96	0.966667	1.17
1985:09	3.24737	3.35249	3.45821	3.66442	3.57488	3.5818	3.79009	1.24333	1.25	0.96	0.966667
1985:10	3.23501	3.24737	3.35249	3.45821	3.66442	3.57488	3.5818	1.23667	1.24333	1.25	0.96
1985:11	3.51377	3.23501	3.24737	3.35249	3.45821	3.66442	3.57488	1.32833	1.23667	1.24333	1.25
1985:12	3.79147	3.51377	3.23501	3.24737	3.35249	3.45821	3.66442	1.325	1.32833	1.23667	1.24333
1986:01	3.97351	3.79147	3.51377	3.23501	3.24737	3.35249	3.45821	1.61167	1.325	1.32833	1.23667
1986:02	3.19849	3.97351	3.79147	3.51377	3.23501	3.24737	3.35249	1.10833	1.61167	1.325	1.32833
1986:03	2.15356	3.19849	3.97351	3.79147	3.51377	3.23501	3.24737	1.105	1.10833	1.61167	1.325
1986:04	1.58879	2.15356	3.19849	3.97351	3.79147	3.51377	3.23501	1.20333	1.105	1.10833	1.61167
1986:05	1.6791	1.58879	2.15356	3.19849	3.97351	3.79147	3.51377	1.09833	1.20333	1.105	1.10833
1986:06	1.76744	1.6791	1.58879	2.15356	3.19849	3.97351	3.79147	1.09333	1.09833	1.20333	1.105
1986:07	1.67131	1.76744	1.6791	1.58879	2.15356	3.19849	3.97351	1.29	1.09333	1.09833	1.20333
1986:08	1.57553	1.67131	1.76744	1.6791	1.58879	2.15356	3.19849	1.38167	1.29	1.09333	1.09833
1986:09	1.75763	1.57553	1.67131	1.76744	1.6791	1.58879	2.15356	1.27167	1.38167	1.29	1.09333
1986:10	1.56682	1.75763	1.57553	1.67131	1.76744	1.6791	1.58879	1.25667	1.27167	1.38167	1.29
1986:11	1.2844	1.56682	1.75763	1.57553	1.67131	1.76744	1.6791	1.33333	1.25667	1.27167	1.38167
1986:12	1.18721	1.2844	1.56682	1.75763	1.57553	1.67131	1.76744	1.60167	1.33333	1.25667	1.27167
1987:01	1.36488	1.18721	1.2844	1.56682	1.75763	1.57553	1.67131	1.56833	1.60167	1.33333	1.25667
1987:02	1.91431	1.36488	1.18721	1.2844	1.56682	1.75763	1.57553	1.53	1.56833	1.60167	1.33333
1987:03	2.84143	1.91431	1.36488	1.18721	1.2844	1.56682	1.75763	1.49	1.53	1.56833	1.60167
1987:04	3.67985	2.84143	1.91431	1.36488	1.18721	1.2844	1.56682	1.74	1.49	1.53	1.56833
1987:05	3.66972	3.67985	2.84143	1.91431	1.36488	1.18721	1.2844	1.68833	1.74	1.49	1.53
1987:06	3.74771	3.66972	3.67985	2.84143	1.91431	1.36488	1.18721	1.73167	1.68833	1.74	1.49
1987:07	3.92694	3.74771	3.66972	3.67985	2.84143	1.91431	1.36488	1.77	1.73167	1.68833	1.74
1987:08	4.28832	3.92694	3.74771	3.66972	3.67985	2.84143	1.91431	1.80667	1.77	1.73167	1.68833
1987:09	4.27273	4.28832	3.92694	3.74771	3.66972	3.67985	2.84143	1.83667	1.80667	1.77	1.73167
1987:10	4.35572	4.27273	4.28832	3.92694	3.74771	3.66972	3.67985	1.66333	1.83667	1.80667	1.77
1987:11	4.52899	4.35572	4.27273	4.28832	3.92694	3.74771	3.66972	1.78	1.66333	1.83667	1.80667
1987:12	4.33213	4.52899	4.35572	4.27273	4.28832	3.92694	3.74771	1.795	1.78	1.66333	1.83667
1988:01	4.12926	4.33213	4.52899	4.35572	4.27273	4.28832	3.92694	1.71667	1.795	1.78	1.66333
1988:02	3.9356	4.12926	4.33213	4.52899	4.35572	4.27273	4.28832	1.63833	1.71667	1.795	1.78
1988:03	3.83244	3.9356	4.12926	4.33213	4.52899	4.35572	4.27273	1.56167	1.63833	1.71667	1.795
1988:04	3.9929	3.83244	3.9356	4.12926	4.33213	4.52899	4.35572	1.78167	1.56167	1.63833	1.71667
1988:05	3.9823	3.9929	3.83244	3.9356	4.12926	4.33213	4.52899	1.50667	1.78167	1.56167	1.63833
1988:06	3.96476	3.9823	3.9929	3.83244	3.9356	4.12926	4.33213	1.62833	1.50667	1.78167	1.56167
1988:07	4.13005	3.96476	3.9823	3.9929	3.83244	3.9356	4.12926	1.56167	1.62833	1.50667	1.78167
1988:08	4.11199	4.13005	3.96476	3.9823	3.9929	3.83244	3.9356	1.29667	1.56167	1.62833	1.50667
1988:09	4.18483	4.11199	4.13005	3.96476	3.9823	3.9929	3.83244	1.43333	1.29667	1.56167	1.62833
1988:10	4.26087	4.18483	4.11199	4.13005	3.96476	3.9823	3.9929	1.37667	1.43333	1.29667	1.56167
1988:11	4.2461	4.26087	4.18483	4.11199	4.13005	3.96476	3.9823	1.42333	1.37667	1.43333	1.29667
1988:12	4.41176	4.2461	4.26087	4.18483	4.11199	4.13005	3.96476	1.37333	1.42333	1.37667	1.43333
1989:01	4.48276	4.41176	4.2461	4.26087	4.18483	4.11199	4.13005	1.23	1.37333	1.42333	1.37667
1989:02	4.64716	4.48276	4.41176	4.2461	4.26087	4.18483	4.11199	1.38667	1.23	1.37333	1.42333
1989:03	4.8927	4.64716	4.48276	4.41176	4.2461	4.26087	4.18483	1.54	1.38667	1.23	1.37333
1989:04	5.03413	4.8927	4.64716	4.48276	4.41176	4.2461	4.26087	1.29833	1.54	1.38667	1.23
1989:05	5.2766	5.03413	4.8927	4.64716	4.48276	4.41176	4.2461	1.26167	1.29833	1.54	1.38667
1989:06	5.16949	5.2766	5.03413	4.8927	4.64716	4.48276	4.41176	1.13	1.26167	1.29833	1.54
1989:07	5.06329	5.16949	5.2766	5.03413	4.8927	4.64716	4.48276	1.19167	1.13	1.26167	1.29833
1989:08	4.62185	5.06329	5.16949	5.2766	5.03413	4.8927	4.64716	1.15333	1.19167	1.13	1.26167
1989:09	4.43515	4.62185	5.06329	5.16949	5.2766	5.03413	4.8927	1.02	1.15333	1.19167	1.13
1989:10	4.58716	4.43515	4.62185	5.06329	5.16949	5.2766	5.03413	0.985	1.02	1.15333	1.19167
1989:11	4.65503	4.58716	4.43515	4.62185	5.06329	5.16949	5.2766	0.855	0.985	1.02	1.15333
1989:12	4.6396	4.65503	4.58716	4.43515	4.62185	5.06329	5.16949	0.823333	0.855	0.985	1.02
1990:01	5.19802	4.6396	4.65503	4.58716	4.43515	4.62185	5.06329	0.791667	0.823333	0.855	0.985
1990:02	5.26316	5.19802	4.6396	4.65503	4.58716	4.43515	4.62185	0.86	0.791667	0.823333	0.855
1990:03	5.23732	5.26316	5.19802	4.6396	4.65503	4.58716	4.43515	0.926667	0.86	0.791667	0.823333
1990:04	4.71162	5.23732	5.26316	5.19802	4.6396	4.65503	4.58716	0.695	0.926667	0.86	0.791667
1990:05	4.3654	4.71162	5.23732	5.26316	5.19802	4.6396	4.65503	0.665	0.695	0.926667	0.86
1990:06	4.67365	4.3654	4.71162	5.23732	5.26316	5.19802	4.6396	0.828333	0.665	0.695	0.926667
1990:07	4.81928	4.67365	4.3654	4.71162	5.23732	5.26316	5.19802	0.496667	0.828333	0.665	0.695
1990:08	5.70281	4.81928	4.67365	4.3654	4.71162	5.23732	5.26316	0.273333	0.496667	0.828333	0.665
1990:09	6.16987	5.70281	4.81928	4.67365	4.3654	4.71162	5.23732	0.0533333	0.273333	0.496667	0.828333
1990:10	6.37959	6.16987	5.70281	4.81928	4.67365	4.3654	4.71162	0.0333333	0.0533333	0.273333	0.496667
1990:11	6.19539	6.37959	6.16987	5.70281	4.81928	4.67365	4.3654	-0.28	0.0333333	0.0533333	0.273333
1990:12	6.25495	6.19539	6.37959	6.16987	5.70281	4.81928	4.67365	-0.391667	-0.28	0.0333333	0.0533333
1991:01	5.64706	6.25495	6.19539	6.37959	6.16987	5.70281	4.81928	-0.496667	-0.391667	-0.28	0.0333333
1991:02	5.3125	5.64706	6.25495	6.19539	6.37959	6.16987	5.70281	-0.706667	-0.496667	-0.391667	-0.28
1991:03	4.82115	5.3125	5.64706	6.25495	6.19539	6.37959	6.16987	-0.913333	-0.706667	-0.496667	-0.391667
1991:04	4.80993	4.82115	5.3125	5.64706	6.25495	6.19539	6.37959	-0.82	-0.913333	-0.706667	-0.496667
1991:05	5.03486	4.80993	4.82115	5.3125	5.64706	6.25495	6.19539	-1.025	-0.82	-0.913333	-0.706667
1991:06	4.69592	5.03486	4.80993	4.82115	5.3125	5.64706	6.25495	-1.03	-1.025	-0.82	-0.913333
1991:07	4.36782	4.69592	5.03486	4.80993	4.82115	5.3125	5.64706	-0.933333	-1.03	-1.025	-0.82
1991:08	3.79939	4.36782	4.69592	5.03486	4.80993	4.82115	5.3125	-1.03333	-0.933333	-1.03	-1.025
1991:09	3.39623	3.79939	4.36782	4.69592	5.03486	4.80993	4.82115	-1.035	-1.03333	-0.933333	-1.03
1991:10	2.84858	3.39623	3.79939	4.36782	4.69592	5.03486	4.80993	-1.135	-1.035	-1.03333	-0.933333
1991:11	3.06657	2.84858	3.39623	3.79939	4.36782	4.69592	5.03486	-1.13333	-1.135	-1.035	-1.03333
1991:12	2.98063	3.06657	2.84858	3.39623	3.79939	4.36782	4.69592	-1.42167	-1.13333	-1.135	-1.035
1992:01	2.67261	2.98063	3.06657	2.84858	3.39623	3.79939	4.36782	-1.41	-1.42167	-1.13333	-1.135
1992:02	2.81899	2.67261	2.98063	3.06657	2.84858	3.39623	3.79939	-1.49667	-1.41	-1.42167	-1.13333
1992:03	3.18991	2.81899	2.67261	2.98063	3.06657	2.84858	3.39623	-1.48333	-1.49667	-1.41	-1.42167
1992:04	3.18283	3.18991	2.81899	2.67261	2.98063	3.06657	2.84858	-1.465	-1.48333	-1.49667	-1.41
1992:05	3.0236	3.18283	3.18991	2.81899	2.67261	2.98063	3.06657	-1.64333	-1.465	-1.48333	-1.49667
1992:06	3.01471	3.0236	3.18283	3.18991	2.81899	2.67261	2.98063	-1.81667	-1.64333	-1.465	-1.48333
1992:07	3.15712	3.01471	3.0236	3.18283	3.18991	2.81899	2.67261	-1.69	-1.81667	-1.64333	-1.465
1992:08	3.07467	3.15712	3.01471	3.0236	3.18283	3.18991	2.81899	-1.56333	-1.69	-1.81667	-1.64333
1992:09	2.9927	3.07467	3.15712	3.01471	3.0236	3.18283	3.18991	-1.535	-1.56333	-1.69	-1.81667
1992:10	3.27988	2.9927	3.07467	3.15712	3.01471	3.0236	3.18283	-1.21333	-1.535	-1.56333	-1.69
1992:11	3.12046	3.27988	2.9927	3.07467	3.15712	3.01471	3.0236	-1.28667	-1.21333	-1.535	-1.56333
1992:12	2.96671	3.12046	3.27988	2.9927	3.07467	3.15712	3.01471	-1.25833	-1.28667	-1.21333	-1.535
1993:01	3.2538	2.96671	3.12046	3.27988	2.9927	3.07467	3.15712	-1.13167	-1.25833	-1.28667	-1.21333
1993:02	3.24675	3.2538	2.96671	3.12046	3.27988	2.9927	3.07467	-0.908333	-1.13167	-1.25833	-1.28667
1993:03	3.01941	3.24675	3.2538	2.96671	3.12046	3.27988	2.9927	-0.786667	-0.908333	-1.13167	-1.25833
1993:04	3.15638	3.01941	3.24675	3.2538	2.96671	3.12046	3.27988	-0.858333	-0.786667	-0.908333	-1.13167
1993:05	3.22119	3.15638	3.01941	3.24675	3.2538	2.96671	3.12046	-0.833333	-0.858333	-0.786667	-0.908333
1993:06	2.99786	3.22119	3.15638	3.01941	3.24675	3.2538	2.96671	-0.706667	-0.833333	-0.858333	-0.786667
1993:07	2.84698	2.99786	3.22119	3.15638	3.01941	3.24675	3.2538	-0.581667	-0.706667	-0.833333	-0.858333
1993:08	2.84091	2.84698	2.99786	3.22119	3.15638	3.01941	3.24675	-0.461667	-0.581667	-0.706667	-0.833333
1993:09	2.764	2.84091	2.84698	2.99786	3.22119	3.15638	3.01941	-0.34	-0.461667	-0.581667	-0.706667
1993:10	2.75229	2.764	2.84091	2.84698	2.99786	3.22119	3.15638	-0.416667	-0.34	-0.461667	-0.581667
1993:11	2.74455	2.75229	2.764	2.84091	2.84698	2.99786	3.22119	-0.195	-0.416667	-0.34	-0.461667
1993:12	2.81096	2.74455	2.75229	2.764	2.84091	2.84698	2.99786	-0.075	-0.195	-0.416667	-0.34
1994:01	2.45098	2.81096	2.74455	2.75229	2.764	2.84091	2.84698	-0.155	-0.075	-0.195	-0.416667
1994:02	2.51572	2.45098	2.81096	2.74455	2.75229	2.764	2.84091	-0.131667	-0.155	-0.075	-0.195
1994:03	2.65178	2.51572	2.45098	2.81096	2.74455	2.75229	2.764	-0.00666667	-0.131667	-0.155	-0.075
1994:04	2.36439	2.65178	2.51572	2.45098	2.81096	2.74455	2.75229	0.113333	-0.00666667	-0.131667	-0.155
1994:05	2.28849	2.36439	2.65178	2.51572	2.45098	2.81096	2.74455	0.428333	0.113333	-0.00666667	-0.131667
1994:06	2.4948	2.28849	2.36439	2.65178	2.51572	2.45098	2.81096	0.441667	0.428333	0.113333	-0.00666667
1994:07	2.69896	2.4948	2.28849	2.36439	2.65178	2.51572	2.45098	0.456667	0.441667	0.428333	0.113333
1994:08	2.90055	2.69896	2.4948	2.28849	2.36439	2.65178	2.51572	0.57	0.456667	0.441667	0.428333
1994:09	2.96552	2.90055	2.69896	2.4948	2.28849	2.36439	2.65178	0.68	0.57	0.456667	0.441667
1994:10	2.60989	2.96552	2.90055	2.69896	2.4948	2.28849	2.36439	0.788333	0.68	0.57	0.456667
1994:11	2.60274	2.60989	2.96552	2.90055	2.69896	2.4948	2.28849	0.991667	0.788333	0.68	0.57
1994:12	2.5974	2.60274	2.60989	2.96552	2.90055	2.69896	2.4948	1.09333	0.991667	0.788333	0.68
1995:01	2.87081	2.5974	2.60274	2.60989	2.96552	2.90055	2.69896	0.996667	1.09333	0.991667	0.788333
1995:02	2.86299	2.87081	2.5974	2.60274	2.60989	2.96552	2.90055	1.19833	0.996667	1.09333	0.991667
1995:03	2.78722	2.86299	2.87081	2.5974	2.60274	2.60989	2.96552	1.20167	1.19833	0.996667	1.09333
1995:04	3.125	2.78722	2.86299	2.87081	2.5974	2.60274	2.60989	0.808333	1.20167	1.19833	0.996667
1995:05	3.11864	3.125	2.78722	2.86299	2.87081	2.5974	2.60274	1.01167	0.808333	1.20167	1.19833
1995:06	3.0426	3.11864	3.125	2.78722	2.86299	2.87081	2.5974	1.01833	1.01167	0.808333	1.20167
1995:07	2.83019	3.0426	3.11864	3.125	2.78722	2.86299	2.87081	0.921667	1.01833	1.01167	0.808333
1995:08	2.61745	2.83019	3.0426	3.11864	3.125	2.78722	2.86299	0.921667	0.921667	1.01833	1.01167
1995:09	2.54521	2.61745	2.83019	3.0426	3.11864	3.125	2.78722	1.01667	0.921667	0.921667	1.01833
1995:10	2.74431	2.54521	2.61745	2.83019	3.0426	3.11864	3.125	1.11	1.01667	0.921667	0.921667
1995:11	2.60347	2.74431	2.54521	2.61745	2.83019	3.0426	3.11864	1	1.11	1.01667	0.921667
1995:12	2.53165	2.60347	2.74431	2.54521	2.61745	2.83019	3.0426	0.988333	1	1.11	1.01667
1996:01	2.7907	2.53165	2.60347	2.74431	2.54521	2.61745	2.83019	0.975	0.988333	1	1.11
1996:02	2.71703	2.7907	2.53165	2.60347	2.74431	2.54521	2.61745	1.05667	0.975	0.988333	1
1996:03	2.84392	2.71703	2.7907	2.53165	2.60347	2.74431	2.54521	1.035	1.05667	0.975	0.988333
1996:04	2.83267	2.84392	2.71703	2.7907	2.53165	2.60347	2.74431	0.916667	1.035	1.05667	0.975
1996:05	2.82709	2.83267	2.84392	2.71703	2.7907	2.53165	2.60347	0.895	0.916667	1.035	1.05667
1996:06	2.82152	2.82709	2.83267	2.84392	2.71703	2.7907	2.53165	1.16833	0.895	0.916667	1.035
1996:07	2.88336	2.82152	2.82709	2.83267	2.84392	2.71703	2.7907	0.946667	1.16833	0.895	0.916667
1996:08	2.8123	2.88336	2.82152	2.82709	2.83267	2.84392	2.71703	1.31667	0.946667	1.16833	0.895
1996:09	3.00457	2.8123	2.88336	2.82152	2.82709	2.83267	2.84392	1.18833	1.31667	0.946667	1.16833
1996:10	3.06189	3.00457	2.8123	2.88336	2.82152	2.82709	2.83267	1.15833	1.18833	1.31667	0.946667
1996:11	3.25309	3.06189	3.00457	2.8123	2.88336	2.82152	2.82709	0.931667	1.15833	1.18833	1.31667
1996:12	3.37882	3.25309	3.06189	3.00457	2.8123	2.88336	2.82152	0.9	0.931667	1.15833	1.18833
1997:01	3.03814	3.37882	3.25309	3.06189	3.00457	2.8123	2.88336	0.966667	0.9	0.931667	1.15833
1997:02	3.03226	3.03814	3.37882	3.25309	3.06189	3.00457	2.8123	1.03	0.966667	0.9	0.931667
1997:03	2.76527	3.03226	3.03814	3.37882	3.25309	3.06189	3.00457	0.993333	1.03	0.966667	0.9
1997:04	2.43434	2.76527	3.03226	3.03814	3.37882	3.25309	3.06189	1.055	0.993333	1.03	0.966667
1997:05	2.23785	2.43434	2.76527	3.03226	3.03814	3.37882	3.25309	1.21	1.055	0.993333	1.03
1997:06	2.23357	2.23785	2.43434	2.76527	3.03226	3.03814	3.37882	1.06333	1.21	1.055	0.993333
1997:07	2.16561	2.23357	2.23785	2.43434	2.76527	3.03226	3.03814	1.11667	1.06333	1.21	1.055
1997:08	2.29008	2.16561	2.23357	2.23785	2.43434	2.76527	3.03226	1.17	1.11667	1.06333	1.21
1997:09	2.2194	2.29008	2.16561	2.23357	2.23785	2.43434	2.76527	1.025	1.17	1.11667	1.06333
1997:10	2.08597	2.2194	2.29008	2.16561	2.23357	2.23785	2.43434	1.18167	1.025	1.17	1.11667
1997:11	1.89036	2.08597	2.2194	2.29008	2.16561	2.23357	2.23785	1.235	1.18167	1.025	1.17
1997:12	1.69705	1.89036	2.08597	2.2194	2.29008	2.16561	2.23357	1.09	1.235	1.18167	1.025
1998:01	1.63112	1.69705	1.89036	2.08597	2.2194	2.29008	2.16561	1.145	1.09	1.235	1.18167
1998:02	1.4402	1.63112	1.69705	1.89036	2.08597	2.2194	2.29008	1.10333	1.145	1.09	1.235
1998:03	1.37672	1.4402	1.63112	1.69705	1.89036	2.08597	2.2194	0.965	1.10333	1.145	1.09
1998:04	1.4384	1.37672	1.4402	1.63112	1.69705	1.89036	2.08597	1.31833	0.965	1.10333	1.145
1998:05	1.68856	1.4384	1.37672	1.4402	1.63112	1.69705	1.89036	1.17333	1.31833	0.965	1.10333
1998:06	1.62297	1.68856	1.4384	1.37672	1.4402	1.63112	1.69705	1.03167	1.17333	1.31833	0.965
1998:07	1.74564	1.62297	1.68856	1.4384	1.37672	1.4402	1.63112	0.991667	1.03167	1.17333	1.31833
1998:08	1.61692	1.74564	1.62297	1.68856	1.4384	1.37672	1.4402	0.953333	0.991667	1.03167	1.17333
1998:09	1.4268	1.61692	1.74564	1.62297	1.68856	1.4384	1.37672	0.818333	0.953333	0.991667	1.03167
1998:10	1.48607	1.4268	1.61692	1.74564	1.62297	1.68856	1.4384	0.88	0.818333	0.953333	0.991667
1998:11	1.48423	1.48607	1.4268	1.61692	1.74564	1.62297	1.68856	0.943333	0.88	0.818333	0.953333
1998:12	1.60692	1.48423	1.48607	1.4268	1.61692	1.74564	1.62297	0.908333	0.943333	0.88	0.818333
1999:01	1.66667	1.60692	1.48423	1.48607	1.4268	1.61692	1.74564	0.97	0.908333	0.943333	0.88
1999:02	1.66667	1.66667	1.60692	1.48423	1.48607	1.4268	1.61692	0.833333	0.97	0.908333	0.943333
1999:03	1.7284	1.66667	1.66667	1.60692	1.48423	1.48607	1.4268	0.995	0.833333	0.97	0.908333
1999:04	2.28113	1.7284	1.66667	1.66667	1.60692	1.48423	1.48607	0.86	0.995	0.833333	0.97
1999:05	2.09102	2.28113	1.7284	1.66667	1.66667	1.60692	1.48423	0.928333	0.86	0.995	0.833333
1999:06	1.9656	2.09102	2.28113	1.7284	1.66667	1.66667	1.60692	0.798333	0.928333	0.86	0.995
1999:07	2.14461	1.9656	2.09102	2.28113	1.7284	1.66667	1.66667	0.768333	0.798333	0.928333	0.86
1999:08	2.26438	2.14461	1.9656	2.09102	2.28113	1.7284	1.66667	0.838333	0.768333	0.798333	0.928333
1999:09	2.62997	2.26438	2.14461	1.9656	2.09102	2.28113	1.7284	0.81	0.838333	0.768333	0.798333
1999:10	2.56254	2.62997	2.26438	2.14461	1.9656	2.09102	2.28113	0.881667	0.81	0.838333	0.768333
1999:11	2.62035	2.56254	2.62997	2.26438	2.14461	1.9656	2.09102	0.856667	0.881667	0.81	0.838333
1999:12	2.6764	2.62035	2.56254	2.62997	2.26438	2.14461	1.9656	0.931667	0.856667	0.881667	0.81
2000:01	2.79296	2.6764	2.62035	2.56254	2.62997	2.26438	2.14461	0.905	0.931667	0.856667	0.881667
2000:02	3.21797	2.79296	2.6764	2.62035	2.56254	2.62997	2.26438	0.783333	0.905	0.931667	0.856667
2000:03	3.76214	3.21797	2.79296	2.6764	2.62035	2.56254	2.62997	0.86	0.783333	0.905	0.931667
2000:04	3.01386	3.76214	3.21797	2.79296	2.6764	2.62035	2.56254	1.02667	0.86	0.783333	0.905
2000:05	3.13253	3.01386	3.76214	3.21797	2.79296	2.6764	2.62035	0.8	1.02667	0.86	0.783333
2000:06	3.73494	3.13253	3.01386	3.76214	3.21797	2.79296	2.6764	0.773333	0.8	1.02667	0.86
2000:07	3.59928	3.73494	3.13253	3.01386	3.76214	3.21797	2.79296	0.745	0.773333	0.8	1.02667
2000:08	3.35129	3.59928	3.73494	3.13253	3.01386	3.76214	3.21797	0.618333	0.745	0.773333	0.8
2000:09	3.4565	3.35129	3.59928	3.73494	3.13253	3.01386	3.76214	0.79	0.618333	0.745	0.773333
2000:10	3.45033	3.4565	3.35129	3.59928	3.73494	3.13253	3.01386	0.763333	0.79	0.618333	0.745
2000:11	3.44418	3.45033	3.4565	3.35129	3.59928	3.73494	3.13253	0.735	0.763333	0.79	0.618333
2000:12	3.43602	3.44418	3.45033	3.4565	3.35129	3.59928	3.73494	0.706667	0.735	0.763333	0.79
2001:01	3.7212	3.43602	3.44418	3.45033	3.4565	3.35129	3.59928	0.383333	0.706667	0.735	0.763333
2001:02	3.52941	3.7212	3.43602	3.44418	3.45033	3.4565	3.35129	0.361667	0.383333	0.706667	0.735
2001:03	2.98246	3.52941	3.7212	3.43602	3.44418	3.45033	3.4565	0.241667	0.361667	0.383333	0.706667
2001:04	3.21826	2.98246	3.52941	3.7212	3.43602	3.44418	3.45033	0.121667	0.241667	0.361667	0.383333
2001:05	3.56308	3.21826	2.98246	3.52941	3.7212	3.43602	3.44418	0.2	0.121667	0.241667	0.361667
2001:06	3.19396	3.56308	3.21826	2.98246	3.52941	3.7212	3.43602	-0.0133333	0.2	0.121667	0.241667
2001:07	2.72148	3.19396	3.56308	3.21826	2.98246	3.52941	3.7212	-0.128333	-0.0133333	0.2	0.121667
2001:08	2.72148	2.72148	3.19396	3.56308	3.21826	2.98246	3.52941	-0.431667	-0.128333	-0.0133333	0.2
2001:09	2.59217	2.72148	2.72148	3.19396	3.56308	3.21826	2.98246	-0.535	-0.431667	-0.128333	-0.0133333
2001:10	2.12766	2.59217	2.72148	2.72148	3.19396	3.56308	3.21826	-0.833333	-0.535	-0.431667	-0.128333
2001:11	1.89437	2.12766	2.59217	2.72148	2.72148	3.19396	3.56308	-1.03167	-0.833333	-0.535	-0.431667
2001:12	1.60367	1.89437	2.12766	2.59217	2.72148	2.72148	3.19396	-1.22667	-1.03167	-0.833333	-0.535
2002:01	1.1959	1.60367	1.89437	2.12766	2.59217	2.72148	2.72148	-1.22	-1.22667	-1.03167	-0.833333
2002:02	1.13636	1.1959	1.60367	1.89437	2.12766	2.59217	2.72148	-1.21167	-1.22	-1.22667	-1.03167
2002:03	1.36286	1.13636	1.1959	1.60367	1.89437	2.12766	2.59217	-1.20333	-1.21167	-1.22	-1.22667
2002:04	1.64399	1.36286	1.13636	1.1959	1.60367	1.89437	2.12766	-1.39	-1.20333	-1.21167	-1.22
2002:05	1.24083	1.64399	1.36286	1.13636	1.1959	1.60367	1.89437	-1.275	-1.39	-1.20333	-1.21167
2002:06	1.06922	1.24083	1.64399	1.36286	1.13636	1.1959	1.60367	-1.26167	-1.275	-1.39	-1.20333
2002:07	1.46561	1.06922	1.24083	1.64399	1.36286	1.13636	1.1959	-1.24667	-1.26167	-1.275	-1.39
2002:08	1.74746	1.46561	1.06922	1.24083	1.64399	1.36286	1.13636	-1.13167	-1.24667	-1.26167	-1.275
2002:09	1.516	1.74746	1.46561	1.06922	1.24083	1.64399	1.36286	-1.11833	-1.13167	-1.24667	-1.26167
2002:10	2.02703	1.516	1.74746	1.46561	1.06922	1.24083	1.64399	-1.10167	-1.11833	-1.13167	-1.24667
2002:11	2.25352	2.02703	1.516	1.74746	1.46561	1.06922	1.24083	-1.28	-1.10167	-1.11833	-1.13167
2002:12	2.48027	2.25352	2.02703	1.516	1.74746	1.46561	1.06922	-1.35833	-1.28	-1.10167	-1.11833
2003:01	2.75746	2.48027	2.25352	2.02703	1.516	1.74746	1.46561	-1.13833	-1.35833	-1.28	-1.10167
2003:02	3.14607	2.75746	2.48027	2.25352	2.02703	1.516	1.74746	-1.21667	-1.13833	-1.35833	-1.28
2003:03	3.02521	3.14607	2.75746	2.48027	2.25352	2.02703	1.516	-1.19667	-1.21667	-1.13833	-1.35833
2003:04	2.17513	3.02521	3.14607	2.75746	2.48027	2.25352	2.02703	-1.26833	-1.19667	-1.21667	-1.13833
2003:05	1.89415	2.17513	3.02521	3.14607	2.75746	2.48027	2.25352	-1.34	-1.26833	-1.19667	-1.21667
2003:06	1.94878	1.89415	2.17513	3.02521	3.14607	2.75746	2.48027	-1.51	-1.34	-1.26833	-1.19667
2003:07	2.05556	1.94878	1.89415	2.17513	3.02521	3.14607	2.75746	-1.38167	-1.51	-1.34	-1.26833
2003:08	2.21607	2.05556	1.94878	1.89415	2.17513	3.02521	3.14607	-1.255	-1.38167	-1.51	-1.34
2003:09	2.37832	2.21607	2.05556	1.94878	1.89415	2.17513	3.02521	-1.23	-1.255	-1.38167	-1.51
2003:10	2.04194	2.37832	2.21607	2.05556	1.94878	1.89415	2.17513	-1.105	-1.23	-1.255	-1.38167
2003:11	1.92837	2.04194	2.37832	2.21607	2.05556	1.94878	1.89415	-0.881667	-1.105	-1.23	-1.255
2003:12	2.0352	1.92837	2.04194	2.37832	2.21607	2.05556	1.94878	-0.76	-0.881667	-1.105	-1.23
2004:01	2.02629	2.0352	1.92837	2.04194	2.37832	2.21607	2.05556	-0.736667	-0.76	-0.881667	-1.105
2004:02	1.68845	2.02629	2.0352	1.92837	2.04194	2.37832	2.21607	-0.616667	-0.736667	-0.76	-0.881667
2004:03	1.74008	1.68845	2.02629	2.0352	1.92837	2.04194	2.37832	-0.79	-0.616667	-0.736667	-0.76
2004:04	2.29258	1.74008	1.68845	2.02629	2.0352	1.92837	2.04194	-0.568333	-0.79	-0.616667	-0.736667
2004:05	2.89776	2.29258	1.74008	1.68845	2.02629	2.0352	1.92837	-0.545	-0.568333	-0.79	-0.616667
2004:06	3.16767	2.89776	2.29258	1.74008	1.68845	2.02629	2.0352	-0.523333	-0.545	-0.568333	-0.79
2004:07	2.93958	3.16767	2.89776	2.29258	1.74008	1.68845	2.02629	-0.403333	-0.523333	-0.545	-0.568333
2004:08	2.54743	2.93958	3.16767	2.89776	2.29258	1.74008	1.68845	-0.283333	-0.403333	-0.523333	-0.545
2004:09	2.53917	2.54743	2.93958	3.16767	2.89776	2.29258	1.74008	-0.263333	-0.283333	-0.403333	-0.523333
2004:10	3.19091	2.53917	2.54743	2.93958	3.16767	2.89776	2.29258	-0.34	-0.263333	-0.283333	-0.403333
2004:11	3.62162	3.19091	2.53917	2.54743	2.93958	3.16767	2.89776	-0.218333	-0.34	-0.263333	-0.283333
2004:12	3.34232	3.62162	3.19091	2.53917	2.54743	2.93958	3.16767	-0.195	-0.218333	-0.34	-0.263333
2005:01	2.84487	3.34232	3.62162	3.19091	2.53917	2.54743	2.93958	-0.0733333	-0.195	-0.218333	-0.34
2005:02	3.05303	2.84487	3.34232	3.62162	3.19091	2.53917	2.54743	-0.151667	-0.0733333	-0.195	-0.218333
2005:03	3.20684	3.05303	2.84487	3.34232	3.62162	3.19091	2.53917	0.0683333	-0.151667	-0.0733333	-0.195
2005:04	3.36179	3.20684	3.05303	2.84487	3.34232	3.62162	3.19091	0.0916667	0.0683333	-0.151667	-0.0733333
2005:05	2.86929	3.36179	3.20684	3.05303	2.84487	3.34232	3.62162	0.21	0.0916667	0.0683333	-0.151667
2005:06	2.54103	2.86929	3.36179	3.20684	3.05303	2.84487	3.34232	0.326667	0.21	0.0916667	0.0683333
2005:07	3.06716	2.54103	2.86929	3.36179	3.20684	3.05303	2.84487	0.343333	0.326667	0.21	0.0916667
2005:08	3.64693	3.06716	2.54103	2.86929	3.36179	3.20684	3.05303	0.456667	0.343333	0.326667	0.21
2005:09	4.74183	3.64693	3.06716	2.54103	2.86929	3.36179	3.20684	0.375	0.456667	0.343333	0.326667
2005:10	4.3501	4.74183	3.64693	3.06716	2.54103	2.86929	3.36179	0.393333	0.375	0.456667	0.343333
2005:11	3.33855	4.3501	4.74183	3.64693	3.06716	2.54103	2.86929	0.411667	0.393333	0.375	0.456667
2005:12	3.33855	3.33855	4.3501	4.74183	3.64693	3.06716	2.54103	0.528333	0.411667	0.393333	0.375
2006:01	4.01879	3.33855	3.33855	4.3501	4.74183	3.64693	3.06716	0.736667	0.528333	0.411667	0.393333
2006:02	3.63825	4.01879	3.33855	3.33855	4.3501	4.74183	3.64693	0.646667	0.736667	0.528333	0.411667
2006:03	3.41792	3.63825	4.01879	3.33855	3.33855	4.3501	4.74183	0.753333	0.646667	0.736667	0.528333
2006:04	3.61384	3.41792	3.63825	4.01879	3.33855	3.33855	4.3501	0.758333	0.753333	0.646667	0.736667
2006:05	3.97727	3.61384	3.41792	3.63825	4.01879	3.33855	3.33855	0.863333	0.758333	0.753333	0.646667
2006:06	4.18172	3.97727	3.61384	3.41792	3.63825	4.01879	3.33855	0.865	0.863333	0.758333	0.753333
2006:07	4.10467	4.18172	3.97727	3.61384	3.41792	3.63825	4.01879	0.766667	0.865	0.863333	0.758333
2006:08	3.92657	4.10467	4.18172	3.97727	3.61384	3.41792	3.63825	0.763333	0.766667	0.865	0.863333
2006:09	2.01207	3.92657	4.10467	4.18172	3.97727	3.61384	3.41792	0.955	0.763333	0.766667	0.865
2006:10	1.40633	2.01207	3.92657	4.10467	4.18172	3.97727	3.61384	1.04	0.955	0.763333	0.766667
2006:11	1.9687	1.40633	2.01207	3.92657	4.10467	4.18172	3.97727	0.923333	1.04	0.955	0.763333
2006:12	2.52398	1.9687	1.40633	2.01207	3.92657	4.10467	4.18172	1.00167	0.923333	1.04	0.955
2007:01	2.07577	2.52398	1.9687	1.40633	2.01207	3.92657	4.10467	0.783333	1.00167	0.923333	1.04
2007:02	2.42026	2.07577	2.52398	1.9687	1.40633	2.01207	3.92657	0.863333	0.783333	1.00167	0.923333
2007:03	2.7982	2.42026	2.07577	2.52398	1.9687	1.40633	2.01207	0.941667	0.863333	0.783333	1.00167
2007:04	2.59292	2.7982	2.42026	2.07577	2.52398	1.9687	1.40633	0.818333	0.941667	0.863333	0.783333
2007:05	2.70989	2.59292	2.7982	2.42026	2.07577	2.52398	1.9687	0.895	0.818333	0.941667	0.863333
2007:06	2.69277	2.70989	2.59292	2.7982	2.42026	2.07577	2.52398	0.675	0.895	0.818333	0.941667
2007:07	2.31789	2.69277	2.70989	2.59292	2.7982	2.42026	2.07577	0.556667	0.675	0.895	0.818333
2007:08	1.89745	2.31789	2.69277	2.70989	2.59292	2.7982	2.42026	0.638333	0.556667	0.675	0.895
2007:09	2.83383	1.89745	2.31789	2.69277	2.70989	2.59292	2.7982	0.521667	0.638333	0.556667	0.675
2007:10	3.6107	2.83383	1.89745	2.31789	2.69277	2.70989	2.59292	0.505	0.521667	0.638333	0.556667
2007:11	4.37327	3.6107	2.83383	1.89745	2.31789	2.69277	2.70989	0.485	0.505	0.521667	0.638333
2007:12	4.10881	4.37327	3.6107	2.83383	1.89745	2.31789	2.69277	0.168333	0.485	0.505	0.521667
2008:01	4.2947	4.10881	4.37327	3.6107	2.83383	1.89745	2.31789	0.155	0.168333	0.485	0.505
2008:02	4.14296	4.2947	4.10881	4.37327	3.6107	2.83383	1.89745	0.238333	0.155	0.168333	0.485
2008:03	3.9749	4.14296	4.2947	4.10881	4.37327	3.6107	2.83383	0.025	0.238333	0.155	0.168333
2008:04	3.90376	3.9749	4.14296	4.2947	4.10881	4.37327	3.6107	0.108333	0.025	0.238333	0.155
2008:05	4.08841	3.90376	3.9749	4.14296	4.2947	4.10881	4.37327	-0.303333	0.108333	0.025	0.238333
2008:06	4.93597	4.08841	3.90376	3.9749	4.14296	4.2947	4.10881	-0.515	-0.303333	0.108333	0.025
2008:07	5.49751	4.93597	4.08841	3.90376	3.9749	4.14296	4.2947	-0.721667	-0.515	-0.303333	0.108333
2008:08	5.30802	5.49751	4.93597	4.08841	3.90376	3.9749	4.14296	-1.02167	-0.721667	-0.515	-0.303333
2008:09	4.95332	5.30802	5.49751	4.93597	4.08841	3.90376	3.9749	-1.02167	-1.02167	-0.721667	-0.515
2008:10	3.73106	4.95332	5.30802	5.49751	4.93597	4.08841	3.90376	-1.41333	-1.02167	-1.02167	-0.721667
2008:11	1.09992	3.73106	4.95332	5.30802	5.49751	4.93597	4.08841	-1.69667	-1.41333	-1.02167	-1.02167
2008:12	-0.022228	1.09992	3.73106	4.95332	5.30802	5.49751	4.93597	-2.17	-1.69667	-1.41333	-1.02167
2009:01	-0.104631	-0.022228	1.09992	3.73106	4.95332	5.30802	5.49751	-2.635	-2.17	-1.69667	-1.41333
2009:02	0.0639437	-0.104631	-0.022228	1.09992	3.73106	4.95332	5.30802	-3.09	-2.635	-2.17	-1.69667
2009:03	-0.433361	0.0639437	-0.104631	-0.022228	1.09992	3.73106	4.95332	-3.44167	-3.09	-2.635	-2.17
2009:04	-0.60063	-0.433361	0.0639437	-0.104631	-0.022228	1.09992	3.73106	-3.685	-3.44167	-3.09	-2.635
2009:05	-1.02691	-0.60063	-0.433361	0.0639437	-0.104631	-0.022228	1.09992	-4.02167	-3.685	-3.44167	-3.09
2009:06	-1.22871	-1.02691	-0.60063	-0.433361	0.0639437	-0.104631	-0.022228	-4.05667	-4.02167	-3.685	-3.44167
2009:07	-1.9615	-1.22871	-1.02691	-0.60063	-0.433361	0.0639437	-0.104631	-3.99	-4.05667	-4.02167	-3.685
2009:08	-1.48521	-1.9615	-1.22871	-1.02691	-0.60063	-0.433361	0.0639437	-4.02	-3.99	-4.05667	-4.02167
2009:09	-1.36926	-1.48521	-1.9615	-1.22871	-1.02691	-0.60063	-0.433361	-4.14667	-4.02	-3.99	-4.05667
2009:10	-0.236411	-1.36926	-1.48521	-1.9615	-1.22871	-1.02691	-0.60063	-4.27167	-4.14667	-4.02	-3.99
2009:11	1.88222	-0.236411	-1.36926	-1.48521	-1.9615	-1.22871	-1.02691	-4.09667	-4.27167	-4.14667	-4.02
2009:12	2.82264	1.88222	-0.236411	-1.36926	-1.48521	-1.9615	-1.22871	-4.02167	-4.09667	-4.27167	-4.14667
2010:01	2.60719	2.82264	1.88222	-0.236411	-1.36926	-1.48521	-1.9615	-3.84667	-4.02167	-4.09667	-4.27167
2010:02	2.12994	2.60719	2.82264	1.88222	-0.236411	-1.36926	-1.48521	-3.77333	-3.84667	-4.02167	-4.09667
2010:03	2.2854	2.12994	2.60719	2.82264	1.88222	-0.236411	-1.36926	-3.795	-3.77333	-3.84667	-4.02167
2010:04	2.17439	2.2854	2.12994	2.60719	2.82264	1.88222	-0.236411	-3.71667	-3.795	-3.77333	-3.84667
2010:05	1.98687	2.17439	2.2854	2.12994	2.60719	2.82264	1.88222	-3.34167	-3.71667	-3.795	-3.77333
2010:06	1.18161	1.98687	2.17439	2.2854	2.12994	2.60719	2.82264	-3.06833	-3.34167	-3.71667	-3.795
2010:07	1.3832	1.18161	1.98687	2.17439	2.2854	2.12994	2.60719	-3.09333	-3.06833	-3.34167	-3.71667
2010:08	1.19661	1.3832	1.18161	1.98687	2.17439	2.2854	2.12994	-3.01667	-3.09333	-3.06833	-3.34167
2010:09	1.12979	1.19661	1.3832	1.18161	1.98687	2.17439	2.2854	-2.94167	-3.01667	-3.09333	-3.06833
2010:10	1.1613	1.12979	1.19661	1.3832	1.18161	1.98687	2.17439	-2.86667	-2.94167	-3.01667	-3.09333
2010:11	1.06187	1.1613	1.12979	1.19661	1.3832	1.18161	1.98687	-3.08667	-2.86667	-2.94167	-3.01667
2010:12	1.42755	1.06187	1.1613	1.12979	1.19661	1.3832	1.18161	-2.51333	-3.08667	-2.86667	-2.94167
2011:01	1.65028	1.42755	1.06187	1.1613	1.12979	1.19661	1.3832	-2.24	-2.51333	-3.08667	-2.86667
2011:02	2.09426	1.65028	1.42755	1.06187	1.1613	1.12979	1.19661	-2.07	-2.24	-2.51333	-3.08667
2011:03	2.6341	2.09426	1.65028	1.42755	1.06187	1.1613	1.12979	-1.9	-2.07	-2.24	-2.51333
2011:04	3.03662	2.6341	2.09426	1.65028	1.42755	1.06187	1.1613	-1.92833	-1.9	-2.07	-2.24
2011:05	3.46039	3.03662	2.6341	2.09426	1.65028	1.42755	1.06187	-1.855	-1.92833	-1.9	-2.07
2011:06	3.56188	3.46039	3.03662	2.6341	2.09426	1.65028	1.42755	-1.88	-1.855	-1.92833	-1.9
2011:07	3.63085	3.56188	3.46039	3.03662	2.6341	2.09426	1.65028	-1.70833	-1.88	-1.855	-1.92833
2011:08	3.74599	3.63085	3.56188	3.46039	3.03662	2.6341	2.09426	-1.63667	-1.70833	-1.88	-1.855
2011:09	3.86315	3.74599	3.63085	3.56188	3.46039	3.03662	2.6341	-1.56167	-1.63667	-1.70833	-1.88
2011:10	3.53066	3.86315	3.74599	3.63085	3.56188	3.46039	3.03662	-1.38667	-1.56167	-1.63667	-1.70833
2011:11	3.45285	3.53066	3.86315	3.74599	3.63085	3.56188	3.46039	-1.01833	-1.38667	-1.56167	-1.63667
2011:12	3.02493	3.45285	3.53066	3.86315	3.74599	3.63085	3.56188	-0.85	-1.01833	-1.38667	-1.56167
2012:01	2.95747	3.02493	3.45285	3.53066	3.86315	3.74599	3.63085	-0.588333	-0.85	-1.01833	-1.38667
2012:02	2.85929	2.95747	3.02493	3.45285	3.53066	3.86315	3.74599	-0.525	-0.588333	-0.85	-1.01833
2012:03	2.61938	2.85929	2.95747	3.02493	3.45285	3.53066	3.86315	-0.361667	-0.525	-0.588333	-0.85
2012:04	2.26551	2.61938	2.85929	2.95747	3.02493	3.45285	3.53066	-0.201667	-0.361667	-0.525	-0.588333
2012:05	1.73573	2.26551	2.61938	2.85929	2.95747	3.02493	3.45285	-0.238333	-0.201667	-0.361667	-0.525
2012:06	1.71236	1.73573	2.26551	2.61938	2.85929	2.95747	3.02493	-0.178333	-0.238333	-0.201667	-0.361667
2012:07	1.43709	1.71236	1.73573	2.26551	2.61938	2.85929	2.95747	-0.12	-0.178333	-0.238333	-0.201667
2012:08	1.69727	1.43709	1.71236	1.73573	2.26551	2.61938	2.85929	0.0383333	-0.12	-0.178333	-0.238333
2012:09	1.97307	1.69727	1.43709	1.71236	1.73573	2.26551	2.61938	0.39	0.0383333	-0.12	-0.178333
2012:10	2.15897	1.97307	1.69727	1.43709	1.71236	1.73573	2.26551	0.343333	0.39	0.0383333	-0.12
2012:11	1.77142	2.15897	1.97307	1.69727	1.43709	1.71236	1.73573	0.495	0.343333	0.39	0.0383333
2012:12	1.76105	1.77142	2.15897	1.97307	1.69727	1.43709	1.71236	0.541667	0.495	0.343333	0.39
2013:01	1.57861	1.76105	1.77142	2.15897	1.97307	1.69727	1.43709	0.49	0.541667	0.495	0.343333
2013:02	1.97894	1.57861	1.76105	1.77142	2.15897	1.97307	1.69727	0.736667	0.49	0.541667	0.495
2013:03	1.48067	1.97894	1.57861	1.76105	1.77142	2.15897	1.97307	0.878333	0.736667	0.49	0.541667

## Sheet: Variables
Variables			See sources of data described in the paper
Inflation	Inflation	Defined as percentage change of CPI over 12 months	CPI data from FRED
Inf(-1)	1st lag of inflation
Inf(-2)	2nd lag of inflation
Inf(-3)	3rd lag of inflation
Inf(-4)	4th lag of inflation
Inf(-5)	5th lag of inflation
Inf(-6)	6th lag of inflation
Ugap-5	5-year moving average unemployment gap	Defined as "Natural rate of unemployment - Unemployment rate"	Unemployment rate data from FRED
u5gap(-1)	1st lag of unemployment gap
u5gap(-2)	2nd lag of UG
u5gap(-3)	3rd lag of UG
