# Supplementary material for: Modeling changes in US monetary policy with a time-varying nonlinear Taylor rule
Source: publisher site journal article supplement (doi:10.1515/snde-2017-0092), 2018-04-03
Supplement: Supplementary file 3 [file Data_Quaterly_Original.xls]

## Sheet: Data
	Int-mid	Inflation(0)	Urate(0)
1965.4	4.1	2.1	4.2
1966.1	4.6	2.3	3.8
1966.2	4.9	2.3	3.5
1966.3	5.53	3.6	3.8
1966.4	5.76	2.8	3.9
1967.1	5	2.1	3.9
1967.2	3.94	2.7	3.9
1967.3	3.9	2.7	3.9
1967.4	4.13	3.7	4
1968.1	4.71	3.4	3.7
1968.2	6.11	4	3.5
1968.3	6.03	4.3	3.8
1968.4	5.82	3.5	3.7
1969.1	6.61	3.7	3.6
1969.2	8.67	4	3.5
1969.3	9.19	5.1	3.7
1969.4	8.85	3.9	4
1970.1	8.98	4.2	4.2
1970.2	7.94	6.4	4.6
1970.3	6.61	4	5.1
1970.4	5.6	4.2	5.7
1971.1	3.72	4.5	6.1
1971.2	4.63	4.3	6.2
1971.3	5.56	3.8	6.1
1971.4	4.91	2.4	5.9
1972.1	3.29	5.2	5.8
1972.2	4.27	4	5.7
1972.3	4.8	3.3	5.5
1972.4	5.06	2.8	5.3
1973.1	6.58	4.9	5
1973.2	7.84	5.1	4.9
1973.3	10.5	6	4.7
1973.4	10.03	6.1	4.6
1974.1	8.97	8.1	5.4
1974.2	11.31	9	5.2
1974.3	12.01	9.7	5.5
1974.4	9.45	11.9	6.5
1975.1	6.24	7.3	8.5
1975.2	5.22	7	9.2
1975.3	6.14	7.5	8.6
1975.4	5.22	6.6	8.3
1976.1	4.77	5	7.9
1976.2	5.29	5.3	7.4
1976.3	5.29	5.5	7.6
1976.4	4.95	6.1	7.7
1977.1	4.68	5.2	7.7
1977.2	5.35	6.5	6.9
1977.3	5.9	6.4	6.8
1977.4	6.51	6.8	6.9
1978.1	6.78	7.1	6.3
1978.2	7.36	7.7	5.9
1978.3	8.04	7.4	6
1978.4	9.76	7.6	5.9
1979.1	10.06	8.9	5.8
1979.2	10.24	9.6	5.9
1979.3	10.94	8.9	6.1
1979.4	13.18	9.9	6.3
1980.1	14.13	8.1	6.2
1980.2	10.98	10.9	7.3
1980.3	9.61	7.5	8.1
1980.4	15.85	12.4	7.6
1981.1	15.93	11.7	7.5
1981.2	18.52	8.1	7.3
1981.3	17.82	7.2	7.1
1981.4	13.31	9.6	8.3
1982.1	14.78	6.7	9.3
1982.2	14.45	6	9.5
1982.3	10.12	6.4	10
1982.4	9.2	6	10.6
1983.1	8.51	4.5	10.9
1983.2	8.63	3.2	10.1
1983.3	9.56	3.8	9.3
1983.4	9.34	4.6	8.7
1984.1	9.59	5.2	8
1984.2	10.32	4.3	7.6
1984.3	11.64	3.3	7.2
1984.4	9.43	3.8	7.3
1985.1	8.5	4.2	7.2
1985.2	7.97	2.9	7.3
1985.3	7.9	2.8	7.3
1985.4	8.05	3.3	7.1
1986.1	7.86	4	6.8
1986.2	6.85	2.1	7.1
1986.3	6.17	2.5	7
1986.4	6.04	0.7	7
1987.1	6.1	2.6	6.7
1987.2	6.85	3.6	6.4
1987.3	6.73	3.7	6.1
1987.4	6.69	2.6	6.1
1988.1	6.58	3.4	5.9
1988.2	7.09	3.6	5.5
1988.3	8.01	4	5.4
1988.4	8.35	5	5.4
1989.1	9.36	3.9	5.3
1989.2	9.81	4.8	5.3
1989.3	8.99	3.4	5.3
1989.4	8.55	3.2	5.3
1990.1	8.24	4.6	5.5
1990.2	8.18	4.4	5.4
1990.3	8.13	4.6	5.6
1990.4	7.81	3.6	5.9
1991.1	6.25	4.7	6.4
1991.2	5.78	3.1	6.8
1991.3	5.66	2	6.8
1991.4	4.81	2.2	6.9
1992.1	4.06	3.8	7.1
1992.2	3.82	2.7	7.2
1992.3	3.3	1.6	7.6
1992.4	3.09	2.4	7.5
1993.1	3.03	3.4	7.2
1993.2	3	2.2	7
1993.3	3.03	2.5	6.9
1993.4	3.02	2.5	6.8
1994.1	3.25	3	7
1994.2	4.01	1.9	6.5
1994.3	4.47	1.5	6.2
1994.4	5.29	2	5.7
1995.1	5.92	3.1	5.3
1995.2	6.01	2.7	5.7
1995.3	5.74	2.5	5.8
1995.4	5.8	2.1	5.6
1996.1	5.22	3	5.6
1996.2	5.24	2.5	5.5
1996.3	5.22	2.3	5.4
1996.4	5.31	2.5	5.2
1997.1	5.19	3.2	5.2
1997.2	5.5	2.1	5
1997.3	5.54	1.9	4.8
1997.4	5.52	1.7	4.8
1998.1	5.51	1.8	4.6
1998.2	5.49	1.6	4.4
1998.3	5.55	1.4	4.5
1998.4	4.83	1.1	4.6
1999.1	4.76	1.7	4.3
1999.2	4.74	1.4	4.2
1999.3	5.07	1.4	4.2
1999.4	5.42	1.7	4.1
2000.1	5.73	2.1	4
2000.2	6.27	2.7	3.9
2000.3	6.5	1.5	4
2000.4	6.51	2.2	4
2001.1	5.49	3	4.4
2001.2	4.21	3.1	4.6
2001.3	3.65	1.5	4.7
2001.4	2.09	0.4	5.4
2002.1	1.74	1.7	5.9
2002.2	1.75	2.1	5.9
2002.3	1.74	0.8	6
2002.4	1.34	1.8	5.9
2003.1	1.26	1.2	6.2
2003.2	1.26	1	6
2003.3	1.03	0.9	6.3
2003.4	1	0.8	6.2
2004.1	1.01	1.6	5.8
2004.2	1	1.6	5.6
2004.3	1.43	0.9	5.6
2004.4	1.93	1.7	5.5
2005.1	2.5	1.3	5.4
2005.2	3	2.6	5.3
2005.3	3.5	1.6	5
2005.4	4	3	5
2006.1	4.49	2.1	5
2006.2	4.94	3.2	4.7
2006.3	5.25	3	4.7
2006.4	5.25	1.6	4.7
2007.1	5.26	3.7	4.6
2007.2	5.25	2.8	4.6
2007.3	5.02	1.4	4.6
2007.4	4.49	0.8	4.7

## Sheet: Variables
		Variables	Source
	Int-mid	Effective federal funds rate	FRED economic database
	Inflation(0)	Expected value of inflation (Contemporaneous forecast)	Greenbook forecasts
	Urate(0)	Expected value of Unemployment (Contemporaneous Forecast)	Greenbook forecasts
