# Supplementary material for: Modeling changes in US monetary policy with a time-varying nonlinear Taylor rule
Source: publisher site journal article supplement (doi:10.1515/snde-2017-0092), 2018-04-03
Supplement: Supplementary file 5 [file Data_Quaterly_Prepared.xls]

## Sheet: Data
	r	inf	Inf_v	ugap
1965.4	4.1	2.1	0.04242	1.42167
1966.1	4.6	2.3	0.03399	1.71333
1966.2	4.9	2.3	0.0462	1.86667
1966.3	5.53	3.6	0.04548	1.40833
1966.4	5.76	2.8	0.07046	1.15833
1967.1	5	2.1	0.06645	1.03333
1967.2	3.94	2.7	0.06464	0.943333
1967.3	3.9	2.7	0.0649	0.858333
1967.4	4.13	3.7	0.06899	0.67
1968.1	4.71	3.4	0.07146	0.888333
1968.2	6.11	4	0.06893	0.986667
1968.3	6.03	4.3	0.0667	0.578333
1968.4	5.82	3.5	0.06316	0.58
1969.1	6.61	3.7	0.0641	0.571667
1969.2	8.67	4	0.06349	0.568333
1969.3	9.19	5.1	0.0655	0.28
1969.4	8.85	3.9	0.06105	-0.0916667
1970.1	8.98	4.2	0.05904	-0.361667
1970.2	7.94	6.4	0.05946	-0.798333
1970.3	6.61	4	0.05617	-1.29333
1970.4	5.6	4.2	0.05322	-1.85333
1971.1	3.72	4.5	0.04781	-2.16667
1971.2	4.63	4.3	0.0521	-2.16333
1971.3	5.56	3.8	0.05302	-1.96
1971.4	4.91	2.4	0.04867	-1.64667
1972.1	3.29	5.2	0.04594	-1.435
1972.2	4.27	4	0.05561	-1.23833
1972.3	4.8	3.3	0.05305	-0.945
1972.4	5.06	2.8	0.04999	-0.656667
1973.1	6.58	4.9	0.04672	-0.283333
1973.2	7.84	5.1	0.05889	-0.123333
1973.3	10.5	6	0.0698	0.145
1973.4	10.03	6.1	0.26861	0.308333
1974.1	8.97	8.1	0.19234	-0.423333
1974.2	11.31	9	0.16452	-0.136667
1974.3	12.01	9.7	0.13985	-0.348333
1974.4	9.45	11.9	0.18628	-1.245
1975.1	6.24	7.3	0.17309	-3.09333
1975.2	5.22	7	0.15959	-3.58833
1975.3	6.14	7.5	0.15744	-2.78333
1975.4	5.22	6.6	0.20813	-2.31833
1976.1	4.77	5	0.171	-1.795
1976.2	5.29	5.3	0.13649	-1.205
1976.3	5.29	5.5	0.12032	-1.32167
1976.4	4.95	6.1	0.11013	-1.33667
1977.1	4.68	5.2	0.09192	-1.245
1977.2	5.35	6.5	0.1406	-0.358333
1977.3	5.9	6.4	0.12927	-0.186667
1977.4	6.51	6.8	0.10488	-0.22
1978.1	6.78	7.1	0.09534	0.445
1978.2	7.36	7.7	0.10265	0.915
1978.3	8.04	7.4	0.10459	0.868333
1978.4	9.76	7.6	0.09054	1.03
1979.1	10.06	8.9	0.09515	1.18667
1979.2	10.24	9.6	0.09167	1.12333
1979.3	10.94	8.9	0.07999	0.948333
1979.4	13.18	9.9	0.07319	0.76
1980.1	14.13	8.1	0.0714	0.828333
1980.2	10.98	10.9	0.07356	-0.37
1980.3	9.61	7.5	0.07446	-1.24667
1980.4	15.85	12.4	0.11477	-0.786667
1981.1	15.93	11.7	0.09887	-0.731667
1981.2	18.52	8.1	0.10097	-0.546667
1981.3	17.82	7.2	0.10143	-0.355
1981.4	13.31	9.6	0.14881	-1.57167
1982.1	14.78	6.7	0.16076	-2.54833
1982.2	14.45	6	0.14391	-2.68167
1982.3	10.12	6.4	0.1484	-3.06667
1982.4	9.2	6	0.15434	-3.51667
1983.1	8.51	4.5	0.15938	-3.61667
1983.2	8.63	3.2	0.14054	-2.615
1983.3	9.56	3.8	0.15569	-1.60833
1983.4	9.34	4.6	0.16417	-0.841667
1984.1	9.59	5.2	0.1498	-0.01
1984.2	10.32	4.3	0.14243	0.49
1984.3	11.64	3.3	0.13365	0.976667
1984.4	9.43	3.8	0.11108	0.955
1985.1	8.5	4.2	0.09636	1.12167
1985.2	7.97	2.9	0.1014	1.06833
1985.3	7.9	2.8	0.09373	1.06667
1985.4	8.05	3.3	0.08707	1.24333
1986.1	7.86	4	0.07924	1.525
1986.2	6.85	2.1	0.11775	1.205
1986.3	6.17	2.5	0.14822	1.29333
1986.4	6.04	0.7	0.12708	1.27167
1987.1	6.1	2.6	0.11827	1.50167
1987.2	6.85	3.6	0.11346	1.69
1987.3	6.73	3.7	0.1324	1.83167
1987.4	6.69	2.6	0.11515	1.63667
1988.1	6.58	3.4	0.10186	1.595
1988.2	7.09	3.6	0.09927	1.76167
1988.3	8.01	4	0.08842	1.62833
1988.4	8.35	5	0.07962	1.43333
1989.1	9.36	3.9	0.07152	1.37333
1989.2	9.81	4.8	0.06462	1.24
1989.3	8.99	3.4	0.06034	1.13
1989.4	8.55	3.2	0.07386	1.02
1990.1	8.24	4.6	0.06836	0.723333
1990.2	8.18	4.4	0.07724	0.726667
1990.3	8.13	4.6	0.09141	0.428333
1990.4	7.81	3.6	0.12401	0.0533333
1991.1	6.25	4.7	0.10789	-0.491667
1991.2	5.78	3.1	0.10938	-0.913333
1991.3	5.66	2	0.10386	-0.93
1991.4	4.81	2.2	0.10489	-1.035
1992.1	4.06	3.8	0.1066	-1.22167
1992.2	3.82	2.7	0.09859	-1.28333
1992.3	3.3	1.6	0.09365	-1.61667
1992.4	3.09	2.4	0.08428	-1.435
1993.1	3.03	3.4	0.08241	-1.05833
1993.2	3	2.2	0.08084	-0.786667
1993.3	3.03	2.5	0.07692	-0.606667
1993.4	3.02	2.5	0.07145	-0.44
1994.1	3.25	3	0.06394	-0.575
1994.2	4.01	1.9	0.06825	-0.00666667
1994.3	4.47	1.5	0.06959	0.341667
1994.4	5.29	2	0.06572	0.88
1995.1	5.92	3.1	0.07055	1.29333
1995.2	6.01	2.7	0.06646	0.901667
1995.3	5.74	2.5	0.06733	0.818333
1995.4	5.8	2.1	0.06761	1.01667
1996.1	5.22	3	0.06527	0.988333
1996.2	5.24	2.5	0.06387	1.035
1996.3	5.22	2.3	0.05706	1.06833
1996.4	5.31	2.5	0.05265	1.18833
1997.1	5.19	3.2	0.04868	1.1
1997.2	5.5	2.1	0.05797	1.19333
1997.3	5.54	1.9	0.06352	1.26333
1997.4	5.52	1.7	0.05611	1.125
1998.1	5.51	1.8	0.0558	1.19
1998.2	5.49	1.6	0.05348	1.265
1998.3	5.55	1.4	0.04993	1.03167
1998.4	4.83	1.1	0.04854	0.818333
1999.1	4.76	1.7	0.04496	1.00833
1999.2	4.74	1.4	0.0389	0.995
1999.3	5.07	1.4	0.06384	0.898333
1999.4	5.42	1.7	0.05904	0.91
2000.1	5.73	2.1	0.05728	0.931667
2000.2	6.27	2.7	0.06022	0.96
2000.3	6.5	1.5	0.12602	0.773333
2000.4	6.51	2.2	0.1295	0.69
2001.1	5.49	3	0.10114	0.206667
2001.2	4.21	3.1	0.09144	-0.0583333
2001.3	3.65	1.5	0.10654	-0.213333
2001.4	2.09	0.4	0.10806	-0.935
2002.1	1.74	1.7	0.09707	-1.42667
2002.2	1.75	2.1	0.08562	-1.40333
2002.3	1.74	0.8	0.09392	-1.46167
2002.4	1.34	1.8	0.09678	-1.31833
2003.1	1.26	1.2	0.10635	-1.55833
2003.2	1.26	1	0.10042	-1.29667
2003.3	1.03	0.9	0.12327	-1.51
2003.4	1	0.8	0.10323	-1.33
2004.1	1.01	1.6	0.09166	-0.86
2004.2	1	1.6	0.08364	-0.59
2004.3	1.43	0.9	0.10834	-0.523333
2004.4	1.93	1.7	0.10119	-0.363333
2005.1	2.5	1.3	0.11733	-0.195
2005.2	3	2.6	0.12086	-0.0316667
2005.3	3.5	1.6	0.11757	0.326667
2005.4	4	3	0.13781	0.375
2006.1	4.49	2.1	0.26601	0.428333
2006.2	4.94	3.2	0.25216	0.753333
2006.3	5.25	3	0.19177	0.765
2006.4	5.25	1.6	0.17394	0.755
2007.1	5.26	3.7	0.40371	0.801667
2007.2	5.25	2.8	0.34951	0.741667
2007.3	5.02	1.4	0.2728	0.675
2007.4	4.49	0.8	0.23387	0.521667

## Sheet: Variables
		Variables	Source
	r	Effective federal funds rate	FRED economic database
	inf	Expected value of inflation (Contemporaneous forecast)	Greenbook forecasts
	inf_v	Expected inflation variance	Calculated, see the paper
	ugap	5-year moving average unemployment gap	Calculated using Greenbook forecasts of unemployment
